# Supplementary material for: White rice, brown rice and the risk of type 2 diabetes: a systematic review and meta-analysis
Source: HighWire-hosted journal article supplement (doi:10.1136/bmjopen-2022-065426), 2022-09-01
Supplement: bmjopen-2022-065426supp001_data_supplement.pdf [file bmjopen-2022-065426supp001_data_supplement.pdf]

**Supplementary material for: White Rice, Brown Rice and the Risk of Type 2 Diabetes: A Systematic Review and Meta-Analysis.**

**Table of contents:**

Supplemental Table 1: Search terms used in literature search of databases. **Page 4.**

Supplemental Table 2: Relative risk estimates and covariate adjustment of included cohort studies of white rice and brown rice and risk of type 2 diabetes. **Page 5**

Supplemental Table 3: Mean difference and standard error (SE) in T2D risk factors between brown rice and white rice groups from RCTs. **Page 8**

Supplemental Table 4: Overall meta-evidence quality assessment using NutriGrade. **Page 10**

Supplemental figure 1: Forest-plot of white rice intake and risk of T2D stratified by sex. **Page 11**

Supplemental figure 2: Forest-plot of white rice intake and risk of T2D stratified by age. **Page 13**

Supplemental figure 3: Forest-plot of white rice intake and risk of T2D stratified by duration of follow-up. **Page 15**

Supplemental figure 4: Forest-plot of white rice intake and risk of T2D stratified by adjustment for diet quality. **Page 17**

Supplemental figure 5: Forest-plot of white rice intake and risk of T2D stratified by geographic region. **Page 19**

Supplemental figure 6: Forest-plot of white rice intake and risk of T2D stratified by typical rice consuming habits. **Page 21**

Supplemental Figure 7: Fixed-effects cubic spline for intake of white rice in relation to risk of T2D stratified by geographical region. **Page 23**

Supplemental Figure 8: Fixed-effects cubic spline for intake of white rice in relation to risk of T2D stratified by rice consumption habits of region. **Page 24**

Supplemental figure 9: Forest plot of mean difference in HDL cholesterol level between white rice and brown rice groups in RCTs. **Page 25**

Supplemental figure 10: Forest plot of mean difference in systolic blood pressure between white rice and brown rice groups in RCTs. **Page 26**

Supplemental figure 11: Forest plot of mean difference in diastolic blood pressure between white rice and brown rice groups in RCTs. **Page 27**

Supplemental figure 12: Forest plot of mean difference in insulin resistance, HOMA-IR between white rice and brown rice groups in RCTs. **Page 28**

Supplemental figure 13: Forest plot of mean difference in total cholesterol between white rice and brown rice groups in RCTs. **Page 29**

Supplemental figure 14: Forest plot of mean difference in HbA1c between white rice and brown rice groups in RCTs. **Page 30**

Supplemental figure 15: Forest plot of mean difference in triglycerides between white rice and brown rice groups in RCTs. **Page 31**

Supplemental figure 16: Forest plot of mean difference in LDL cholesterol between white rice and brown rice groups in RCTs. **Page 32**

Supplemental figure 17: Forest plot of mean difference in fasting blood glucose (FBG) between white rice and brown rice groups in RCTs. **Page 33**

Supplemental figure 18: Forest plot of mean difference in waist circumference between white rice and brown rice groups in RCTs. **Page 34**

Supplemental figure 19: Influence analysis of individual prospective cohort studies in the meta-analysis of white rice intake and risk of T2D. **Page 35**

Supplemental figure 20: Influence analysis of individual RCTs replacing white rice with brown rice in the meta-analysis of fasting blood glucose. **Page 36**

Supplemental figure 21: Influence analysis of individual RCTs replacing white rice with brown rice in the meta-analysis of HDL cholesterol. **Page 37**

Supplemental figure 22: Influence analysis of individual RCTs replacing white rice with brown rice in the meta-analysis of LDL cholesterol. **Page 38**

Supplemental figure 23: Influence analysis of individual RCTs replacing white rice with brown rice in the meta-analysis of triglycerides. **Page 39**

Supplemental figure 24: Funnel plot for meta-analysis of prospective cohort studies of white rice (WR) intake and risk of T2D. **Page 40**

Supplemental figure 25: Funnel plot for meta-analysis of RCTs replacing white rice with brown rice for fasting blood glucose. **Page 41**

Supplemental figure 26: Funnel plot for meta-analysis of RCTs replacing white rice with brown rice for HDL cholesterol. **Page 42**

Supplemental figure 27: Funnel plot for meta-analysis of RCTs replacing white rice with brown rice for LDL cholesterol. **Page 43**

Supplemental figure 28: Funnel plot for meta-analysis of RCTs replacing white rice with brown rice for triglycerides. **Page 44.**

**Supplemental Table 1: Search terms used in literature search of databases**

| <b>Steps</b> | <b>Search terms</b>                                                                                                                                                                                                                                |
|--------------|----------------------------------------------------------------------------------------------------------------------------------------------------------------------------------------------------------------------------------------------------|
| 1            | 'Oryza sativa'[MeSH] OR 'oryza sativa'[tiab] OR 'rice'[tiab] OR 'grain'[tiab] OR 'grains'[tiab] OR 'brown rice'[tiab] OR 'white rice'[tiab]                                                                                                        |
| 2            | 'Diabetes Mellitus'[MeSH] OR 'diabetes'[tiab] OR 'diabetes mellitus'[tiab]                                                                                                                                                                         |
| 3            | 'insulin'[tiab] OR 'glucose'[tiab] OR 'HDL'[tiab] OR 'high-density lipoprotein'[tiab] OR 'LDL'[tiab] OR 'low-density lipoprotein'[tiab] OR 'cholesterol'[tiab] OR 'triglyceride'[tiab] OR 'triglycerides'[tiab] OR 'glycosylated hemoglobin'[tiab] |
| 4            | #2 OR #3                                                                                                                                                                                                                                           |
| 5            | #1 AND #4                                                                                                                                                                                                                                          |
| 6            | Result (Limit to #5 to Human Studies)                                                                                                                                                                                                              |

**Supplemental Table 2: Relative risk estimates and covariate adjustment of included cohort studies of white rice and brown rice and risk of type 2 diabetes**

| Author                | Location and study population                                    | Relative Risk (95% CI) [intake level] <sup>†</sup>                                                                                                                                                                                                | Adjustments                                                                                                                                                                                                                                                                                  |
|-----------------------|------------------------------------------------------------------|---------------------------------------------------------------------------------------------------------------------------------------------------------------------------------------------------------------------------------------------------|----------------------------------------------------------------------------------------------------------------------------------------------------------------------------------------------------------------------------------------------------------------------------------------------|
| <b>White rice</b>     |                                                                  |                                                                                                                                                                                                                                                   |                                                                                                                                                                                                                                                                                              |
| <b>Hodge, 2004</b>    | Australia. Melbourne Collaborative Cohort Study (MCCS)           | 1.0 (ref.) [ $<23\text{g/d}$ ];<br>0.77 (0.56 to 1.07) [ $23\text{-}22\text{g/d}$ ];<br>0.91 (0.67 to 1.22) [ $33\text{-}55\text{g/d}$ ];<br>0.93 (0.68 to 1.27) [ $\geq 56\text{g/d}$ ]                                                          | Age, sex, country of birth, physical activity, family history of diabetes, alcohol, total energy intake, education, 5-year weight change, body mass index (BMI), and waist-hip ratio (WHR)                                                                                                   |
| <b>Villegas, 2007</b> | China. Shanghai Women's Health Study (SWHS)                      | 1 (ref.) [ $<500\text{g/d}$ ];<br>1.04 (0.86, 1.25) [ $500\text{-}622.5\text{g/d}$ ];<br>1.29 (1.08, 1.54) [ $625\text{-}747.5\text{g/d}$ ];<br>1.78 (1.48, 2.15) [ $\geq 750\text{g/d}$ ]                                                        | Age, daily kilocalories consumption, BMI, WHR, smoking status, alcohol consumption, physical activity, income level, education level, occupation, diagnosis of hypertension                                                                                                                  |
| <b>Nanri, 2010</b>    | Japan. Japan Public Health Center-based Prospective Study (JPHC) | 1 (ref.) [ $<315\text{g/d}$ ];<br>1.24 (1.00, 1.55) [ $315\text{-}420\text{g/d}$ ];<br>1.25 (0.93, 1.67) [ $420\text{-}560\text{g/d}$ ];<br>1.19 (0.85, 1.68) [ $>560\text{g/d}$ ]                                                                | Age, study area, smoking status, alcohol consumption, family history of diabetes, total physical activity, history of hypertension, occupation, total energy intake, coffee consumption, dietary intakes (calcium, magnesium, fiber, fruit, vegetables, fish, rice, bread, and noodles), BMI |
| <b>Nanri, 2010</b>    | Japan. Japan Public Health Center-based Prospective Study (JPHC) | 1 (ref.) [ $<278\text{g/d}$ ];<br>1.15 (0.85, 1.55) [ $280\text{-}417\text{g/d}$ ];<br>1.48 (1.08, 2.02) [ $420\text{-}420\text{g/d}$ ];<br>1.65 (1.06, 2.57) [ $\geq 437\text{g/d}$ ]                                                            | Same as above                                                                                                                                                                                                                                                                                |
| <b>Sun, 2010</b>      | United States. Health Professionals Follow-up Study (HPFS)       | 1 (ref.) [ $<5.3\text{g/d}$ ];<br>1.09 (0.96, 1.24) [ $5.3\text{-}15.8\text{g/d}$ ];<br>1.07 (0.93, 1.23) [ $15.9\text{-}45\text{g/d}$ ];<br>1.30 (1.12, 1.50) [ $45.1\text{-}112.9\text{g/d}$ ];<br>1.02 (0.77, 1.34) [ $\geq 112.9\text{g/d}$ ] | Age, ethnicity, BMI, smoking status, alcohol intake, multivitamin use, physical activity, family history of diabetes, total energy and intake of red meat, fruits and vegetables, whole grains, and coffee                                                                                   |
| <b>Sun, 2010</b>      | United States. Nurses' Health Study (NHS)                        | 1 (ref.) [ $<5.3\text{g/d}$ ];<br>1.00 (0.90, 1.11) [ $5.3\text{-}15.8\text{g/d}$ ];<br>1.07 (0.96, 1.20) [ $15.9\text{-}45\text{g/d}$ ];<br>1.09 (0.97, 1.23) [ $45.1\text{-}112.9\text{g/d}$ ];<br>1.11 (0.87, 1.43) [ $\geq 112.9\text{g/d}$ ] | Same as above, with the further adjustments of postmenopausal status, hormone use, and oral contraceptive use                                                                                                                                                                                |
| <b>Sun, 2010</b>      | United States. Nurses' Health Study II (NHS II)                  | 1 (ref.) [ $<5.3\text{g/d}$ ];<br>0.93 (0.81, 1.07) [ $5.3\text{-}15.8\text{g/d}$ ];<br>0.94 (0.81, 1.10) [ $15.9\text{-}45\text{g/d}$ ];<br>0.95 (0.81, 1.11) [ $45.1\text{-}112.9\text{g/d}$ ];                                                 | Same as above                                                                                                                                                                                                                                                                                |

|                           |                                                                    |                                                                                                                                                         |                                                                                                                                                                                                                        |
|---------------------------|--------------------------------------------------------------------|---------------------------------------------------------------------------------------------------------------------------------------------------------|------------------------------------------------------------------------------------------------------------------------------------------------------------------------------------------------------------------------|
|                           |                                                                    | 1.40 (1.09, 1.80) [ $\geq 112.9\text{g/d}$ ]                                                                                                            |                                                                                                                                                                                                                        |
| <b>Soriguer, 2013</b>     | Spain. Pizarra study (PS)                                          | 1 (ref.) [ $\leq 22.57\text{g/d}$ ];<br>0.41 (0.17, 0.98) [45.1-67.7g/d]                                                                                | Age, sex, obesity and abnormal glucose regulation at baseline, carbohydrate consumption                                                                                                                                |
| <b>Golozar, 2017</b>      | Iran. Golestan Cohort Study (GCS)                                  | 1 (ref.) [ $\leq 71.1\text{g/d}$ ];<br>1.00 (0.78, 1.29) [71.2-120g/d];<br>1.03 (0.77, 1.38) [120.1-210g/d];<br>1.11 (0.83, 1.49) [ $> 210\text{g/d}$ ] | Age, sex, ethnicity, wealth score, education, marital status, employment status, opium, alcohol, occupational physical activity, smoking, quartiles of daily meat intake, quartiles of daily calorie intake, BMI       |
| <b>Golozar, 2017</b>      | Iran. Golestan Cohort Study (GCS)                                  | 1 (ref.) [ $\leq 71.1\text{g/d}$ ];<br>0.70 (0.50, 0.98) [71.2-120g/d];<br>0.85 (0.61, 1.18) [120.1-210g/d];<br>0.95 (0.69, 1.30) [ $> 210\text{g/d}$ ] | Same as above                                                                                                                                                                                                          |
| <b>Golozar, 2017</b>      | Iran. Tehran Lipid and Glucose Study (TLGS)                        | 1 (ref.) [ $< 250\text{g/d}$ ];<br>0.88 (0.42, 1.83) [250g/d];<br>1.52 (0.57, 4.07) [ $> 250\text{g/d}$ ]                                               | Age, sex, family history of T2D, education, marital status, employment status, total physical activity, smoking, quartiles of daily meat intake, quartiles of daily calorie intake, BMI                                |
| <b>Golozar, 2017</b>      | Iran. Tehran Lipid and Glucose Study (TLGS)                        | 1 (ref.) [ $< 250\text{g/d}$ ];<br>0.88 (0.42, 1.83) [250g/d];<br>1.52 (0.57, 4.07) [ $> 250\text{g/d}$ ]                                               | Same as above                                                                                                                                                                                                          |
| <b>Seah, 2018</b>         | Chinese living in Singapore. Singapore Chinese Health Study (SCHS) | 1 (ref.) [238.1g/d];<br>1.05 (0.94, 1.18) [333.7g/d];<br>1.02 (0.91, 1.14) [402.7g/d];<br>0.97 (0.86, 1.09) [474.4g/d];<br>1.03 (0.90, 1.17) [570.2g/d] | Sex, father's dialect, year of interview, cigarette smoking, education level, physical activity, BMI, history of hypertension, Alternative Healthy Eating Index -- 2010                                                |
| <b>Seah, 2018</b>         | Chinese living in Singapore. Singapore Chinese Health Study (SCHS) | 1 (ref.) [234.0g/d];<br>0.92 (0.79, 1.06) [334.1g/d];<br>0.96 (0.83, 1.11) [404.0g/d];<br>0.99 (0.86, 1.15) [473.8g/d];<br>0.94 (0.83, 1.07) [683.2g/d] | Same as above                                                                                                                                                                                                          |
| <b>Bhavadharini, 2020</b> | 21 countries. Prospective Urban Rural Epidemiology Study (PURE)    | 1 (ref.) [ $< 150\text{g/d}$ ];<br>1.12 (1.01-1.24) [150-300g/d];<br>1.25 (1.10-1.43) [300-450g/d];<br>1.20 (1.02-1.40) [ $> 450\text{g/d}$ ]           | Age, sex, BMI, WHR, family history of diabetes, smoking, location, education, wealth index, physical activity, energy intake, whole grains, refined grains, fruit and vegetables                                       |
| <b>Brown rice</b>         |                                                                    |                                                                                                                                                         |                                                                                                                                                                                                                        |
| <b>Sun, 2010</b>          | United States. Health Professionals Follow-up Study (HPFS)         | 1 (ref.) [ $< 6.5\text{g/d}$ ];<br>0.96 (0.89, 1.04) [6.5-27.86g/d];<br>0.96 (0.82, 1.12) [ $\geq 55.7\text{g/d}$ ]                                     | Age, ethnicity, body mass index, smoking status, alcohol intake, multivitamin use, physical activity, family history of diabetes, total energy and intake of red meat, fruits and vegetables, whole grains, and coffee |

---

|                  |                                  |                                                                                                                                      |                                                                                                               |
|------------------|----------------------------------|--------------------------------------------------------------------------------------------------------------------------------------|---------------------------------------------------------------------------------------------------------------|
| <b>Sun, 2010</b> | Nurses' Health Study (NHS)       | 1 (ref.) [ $<6.5\text{g/d}$ ];<br>0.92 (0.87, 0.98) [ $6.5\text{-}27.86\text{g/d}$ ];<br>0.83 (0.72, 0.96) [ $\geq 55.7\text{g/d}$ ] | Same as above, with the further adjustments of postmenopausal status, hormone use, and oral contraceptive use |
| <b>Sun, 2010</b> | Nurses' Health Study II (NHS II) | 1 (ref.) [ $<6.5\text{g/d}$ ];<br>0.95 (0.87, 1.04) [ $6.5\text{-}27.86\text{g/d}$ ];<br>0.89 (0.75, 1.07) [ $\geq 55.7\text{g/d}$ ] | Same as above                                                                                                 |

---

‡ Serving size assumption of cooked rice is 158 g; conversion of raw rice to cooked rice by multiplying 2.5

---

**Supplemental Table 3: Mean difference and standard error (SE) in T2D risk factors between brown rice and white rice groups from included RCTs**

| Author                 | HbA1c ± SE (%) | TC ± SE (mmol/L) | LDL ± SE (mmol/L) | HDL ± SE (mmol/L) | TG ± SE (mmol/L) | FBG ± SE (mmol/L) | HOMA-IR     | SBP ± SE (mmHg) | DBP ± SE (mmHg) | WC ± SE (cm) |
|------------------------|----------------|------------------|-------------------|-------------------|------------------|-------------------|-------------|-----------------|-----------------|--------------|
| Zhang, 2011            | -0.07 ± 0.09   | 0.29 ± 0.15      | 0.3 ± 0.13        | 0.07 ± 0.04       | -0.05 ± 0.1      | 0.13 ± 0.18       | 0.04 ± 0.22 | -0.21 ± 1.35    | 0.42 ± 0.86     | 0.27 ± 0.35  |
| Wang, 2013             | 0 ± 0.08       | NA*              | -0.181 ± 0.25     | 0.052 ± 0.13      | -0.26 ± 0.45     | 0.222 ± 0.17      | -0.2 ± 0.40 | -9 ± 5.07       | -4 ± 2.64       | -5 ± 2.64    |
| Kazemzadeh, 2014       | -0.04 ± 0.05   | 0.09 ± 0.1       | 0.49 ± 0.1        | 0.08 ± 0.06       | 0.15 ± 0.1       | 0.09 ± 0.08       | NA*         | 0.14 ± 0.26     | 0.8 ± 0.35      | 2.38 ± 0.92  |
| Bui et al 2014         | -0.88 ± 0.28   | -0.88 ± 0.37     | -0.47 ± 0.25      | 0.13 ± 0.11       | -0.67 ± 0.71     | -0.9 ± 0.309      | NA*         | -3.7 ± 7.36     | -4.5 ± 3.72     | -5.5 ± 2.89  |
| Shimabukuro et al 2014 | -0.07 ± 0.2    | -0.14 ± 0.08     | -0.1 ± 0.06       | -0.02 ± 0.04      | -0.06 ± 0.17     | -0.9 ± 0.45       | -1.7 ± 1.93 | -7 ± 2.01       | -2 ± 1.27       | -1.7 ± 1.26  |
| Geng, 2016             | NA*            | -0.52 ± 0.19     | -0.76 ± 0.17      | 0.16 ± 0.06       | -0.26 ± 0.17     | -0.17 ± 0.15      | NA*         | -11.4 ± 3.12    | -8.8 ± 1.93     | -0.6 ± 1.67  |
| Araki, 2017            | 0 ± 0.06       | 0.166 ± 0.17     | 0.158 ± 0.14      | 0.08 ± 0.05       | -0.001 ± 0.01    | 0.194 ± 0.13      | 0.1 ± 0.47  | NA*             | NA*             | -2.7 ± 0.71  |
| Malik, 2019            | -0.04 ± 0.05   | -0.069 ± 0.1     | -0.061 ± 0.10     | -0.002 ± 0.02     | -0.024 ± 0.10    | -0.006 ± 0.10     | -0.2 ± 0.33 | NA*             | NA*             | -0.01 ± 0.55 |
| Kuroda, 2019           | 0.1 ± 0.2      | -0.233 ± 0.37    | -0.161 ± 0.34     | 0.08 ± 0.17       | -0.33 ± 0.43     | 0.733 ± 0.82      | NA*         | 4 ± 9.85        | -1 ± 5.49       | NA*          |
| Mai, 2020              | NA*            | -0.2 ± 0.29      | 0.1 ± 0.29        | 0.34 ± 0.10       | -0.3 ± 0.42      | -0.6 ± 0.29       | -1 ± 0.498  | -2.1 ± 4.90     | -3.4 ± 4.16     | NA*          |
| Ren, 2020              | NA*            | 0.1 ± 0.47       | -0.11 ± 0.33      | -0.08 ± 0.05      | 0.36 ± 0.27      | -0.28 ± 0.51      | NA*         | NA*             | NA*             | NA*          |

\* NA not available

T2D = Type 2 diabetes; HbA1c = Hemoglobin A1C; TC = Total cholesterol; LDL = low-density lipoprotein cholesterol; HDL = high-density lipoprotein cholesterol; TG = Triglycerides; FBG = Fasting blood glucose; HOMA-IR = Assessment of insulin resistance; SBP = Systolic blood pressure; DBP = Diastolic blood pressure; WC = Waist circumference.



---

Conversion of glucose in mg/dl to mmol/l by multiplying 0.0555. Conversion of TAG in mg/dl to mmol/l by multiplying 0.0113. Conversion of cholesterol in mg/dl to mmol/l by multiplying 0.0259.

---

**Supplemental Table 4: Overall meta-evidence quality assessment using NutriGrade**

| <i>Study</i>                  | <i>Risk of bias</i> | <i>Precision</i> | <i>Heterogeneity</i> | <i>Directness</i> | <i>Publication bias</i> | <i>Funding bias</i> | <i>Effect size</i>   | <i>Dose-response</i> | <i>Overall</i>         | <i>Assessment</i>      |
|-------------------------------|---------------------|------------------|----------------------|-------------------|-------------------------|---------------------|----------------------|----------------------|------------------------|------------------------|
| <i>Cohort - BR</i>            | 2                   | 1                | 0.4                  | 1                 | 0                       | 1                   | 0                    | 1                    | 6.4                    | Moderate meta-evidence |
| <i>Cohort - WR</i>            | 1                   | 1                | 0.3                  | 1                 | 1                       | 1                   | 0                    | 1                    | 6.3                    | Moderate meta-evidence |
| <i>Study</i>                  | <i>Risk of bias</i> | <i>Precision</i> | <i>Heterogeneity</i> | <i>Directness</i> | <i>Publication bias</i> | <i>Funding bias</i> | <i>Study design*</i> | <i>Overall</i>       | <i>Assessment</i>      |                        |
| <i>RCTs - LDL cholesterol</i> | 1.5                 | 0                | 0.4                  | 1                 | 1                       | 0.5                 | 2                    | 6.4                  | Moderate meta-evidence |                        |
| <i>RCTs - HDL cholesterol</i> | 1.5                 | 1                | 0.4                  | 1                 | 0.5                     | 0.5                 | 2                    | 6.9                  | High meta-evidence     |                        |
| <i>RCTs - TGs</i>             | 1.5                 | 0                | 0.8                  | 1                 | 1                       | 0.5                 | 2                    | 6.8                  | Moderate meta-evidence |                        |
| <i>RCTs - FBG</i>             | 1.5                 | 0                | 0.4                  | 1                 | 0.5                     | 0.5                 | 2                    | 5.9                  | Moderate meta-evidence |                        |

The assessment is based on the overall score: 0-3.99 = very low meta-evidence; 4-5.99 = low meta-evidence; 6-7.99 = moderate meta-evidence;  $\geq 8$  = high meta-evidence. BR, brown rice; WR, white rice; TGs, triglycerides, FBG, fasting blood glucose.

\* For the randomized control trials, 2 points are automatically gained for the study design

**Supplemental figure 1: Forest-plot of white rice intake and risk of T2D stratified by sex**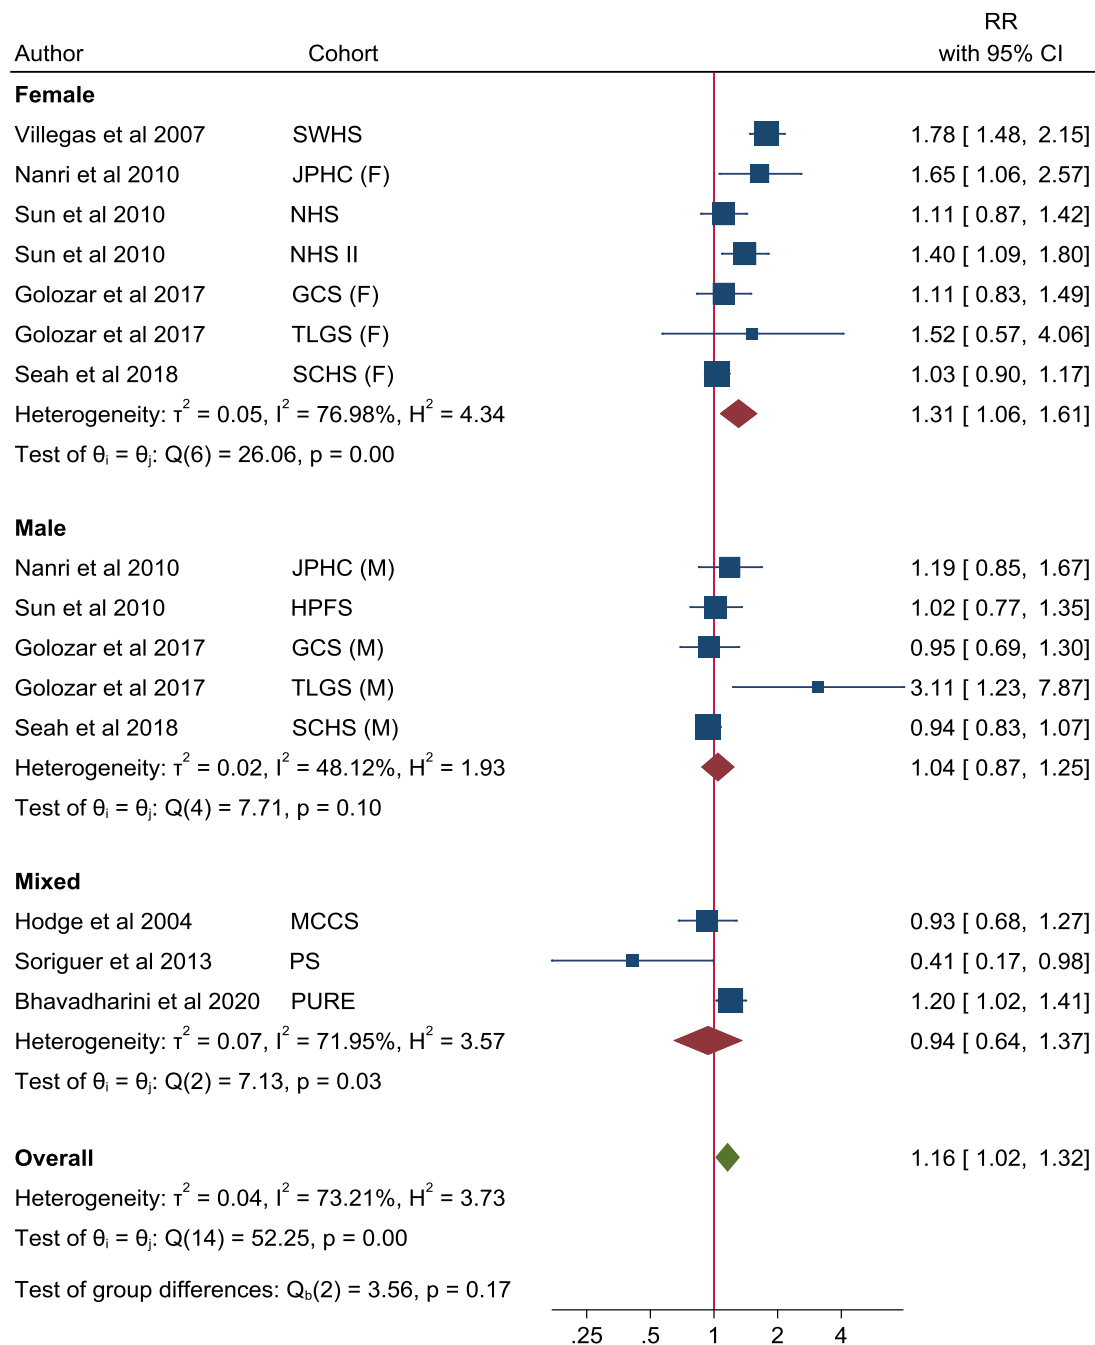

Random-effects DerSimonian-Laird model

Risk of type 2 diabetes (T2D) (RR and 95% CI) comparing extreme categories of white rice intake from prospective cohort studies stratified by sex and overall. Horizontal lines denote 95% CIs; solid squares represent the point estimate of each study with the size proportional to study

weight. Open diamonds represent pooled estimates from the random-effects model (DerSimonian-Laird). Study weights are from the random-effects analysis. The  $I^2$  and P values for heterogeneity are shown. The red line represents unity. M, male; F, female; MCC, Melbourne Collaborative Cohort Study; SWHS, Shanghai Women's Health Study; JPHC, Japan Public Health Center-based Prospective Study; HPFS, Health Professionals Follow-up Study; NHS, Nurses' Health Study; PS, Pizarra study; GCS, Golestan Cohort Study; TLGS, Tehran Lipid and Glucose Study; SCHS, Singapore Chinese Health Study; PURE, Prospective Urban Rural Epidemiology Study. No significant differences between groups ( $p$ -value, 0.12).

**Supplemental figure 2: Forest-plot of white rice intake and risk of T2D stratified by age**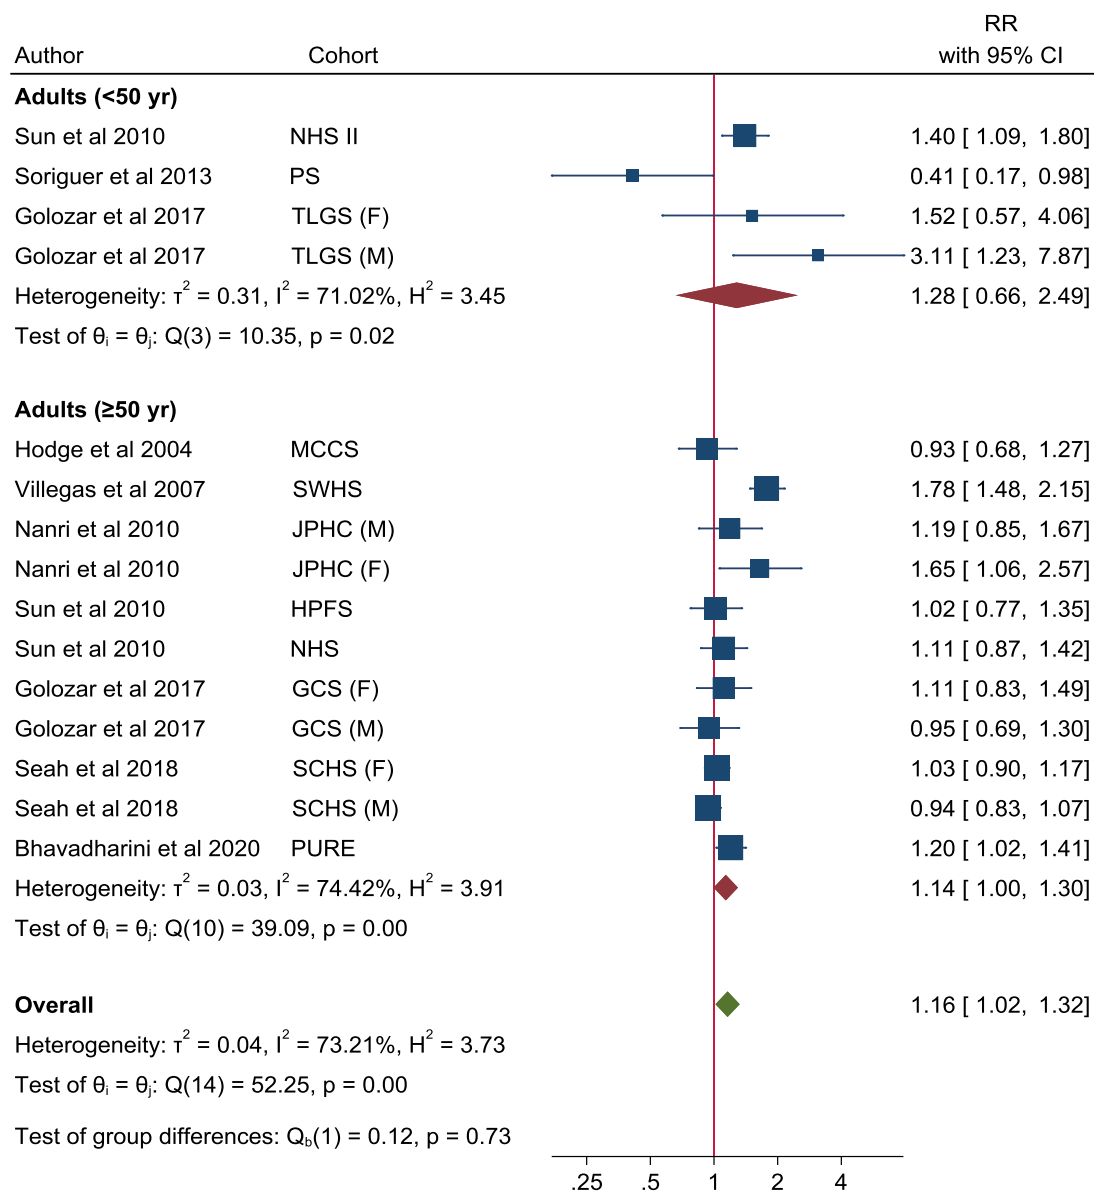

Random-effects DerSimonian-Laird model

Risk of type 2 diabetes (T2D) (RR and 95% CI) comparing extreme categories of white rice intake from prospective cohort studies stratified by age and overall. Horizontal lines denote 95% CIs; solid squares represent the point estimate of each study with the size proportional to study weight. Open diamonds represent pooled estimates from the random-effects model (DerSimonian-Laird). Study weights are from the random-effects analysis. The  $I^2$  and P values for heterogeneity are shown. The red line represents unity. M, male; F, female; MCC, Melbourne Collaborative Cohort Study; SWHS, Shanghai Women's Health Study; JPHC, Japan Public Health Center-based Prospective Study; HPFS, Health Professionals Follow-up Study; NHS,

Nurses' Health Study; PS, Pizarra study; GCS, Golestan Cohort Study; TLGS, Tehran Lipid and Glucose Study; SCHS, Singapore Chinese Health Study; PURE, Prospective Urban Rural Epidemiology Study. No significant differences between groups (p-value, 0.52).

### Supplemental figure 3: Forest-plot of white rice intake and risk of T2D stratified by duration of follow-up

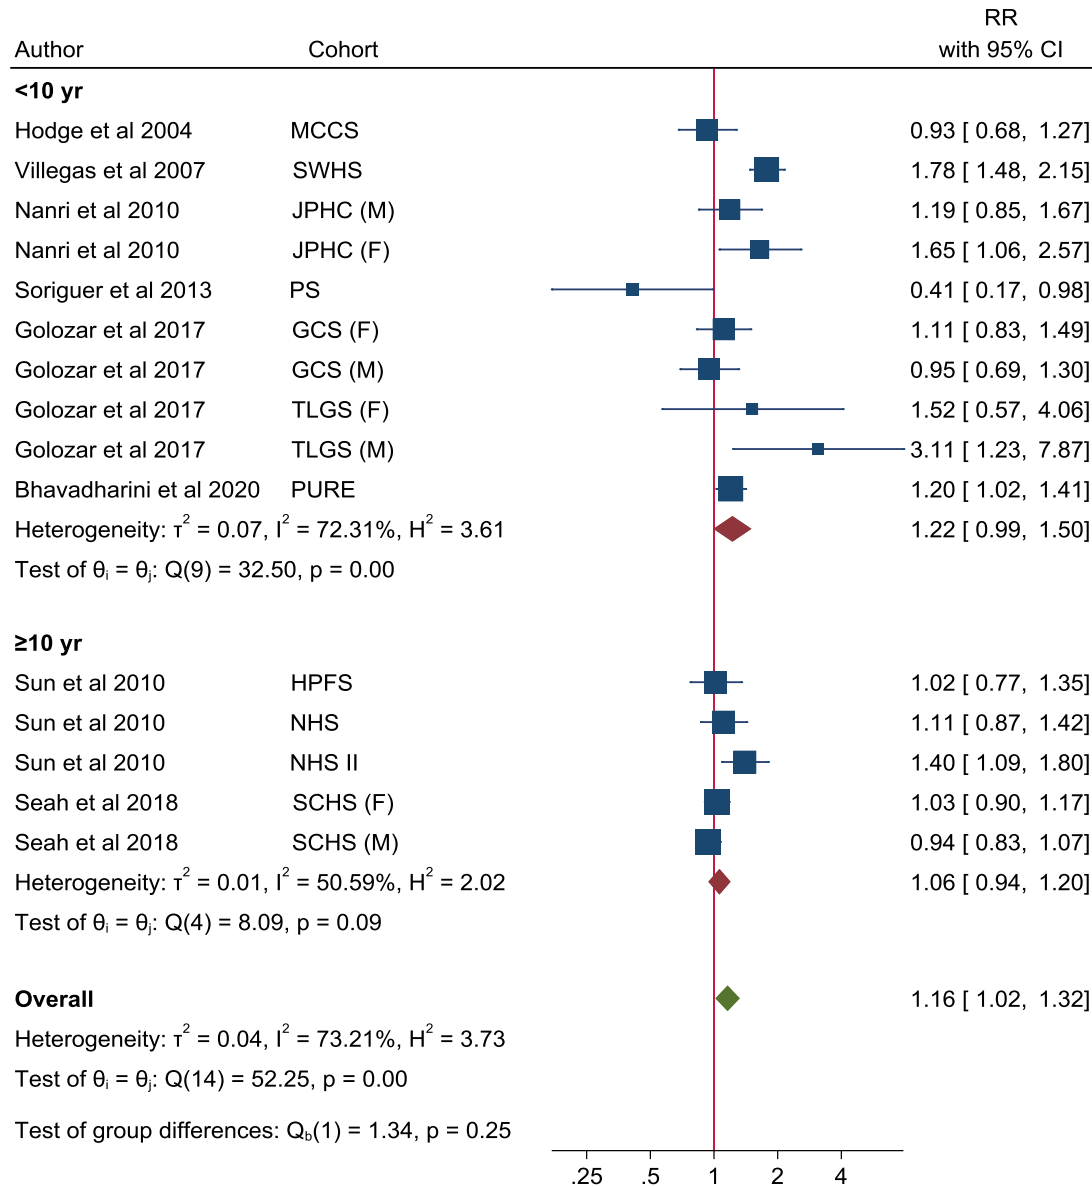

Random-effects DerSimonian-Laird model

Risk of type 2 diabetes (RR and 95% CI) comparing extreme categories of white rice intake from prospective cohort studies stratified by duration and overall. Horizontal lines denote 95% CIs; solid squares represent the point estimate of each study with the size proportional to study weight. Open diamonds represent pooled estimates, from the random-effects model (DerSimonian-Laird). Study weights are from the random-effects analysis. The  $I^2$  and P values for heterogeneity are shown. The red line represents unity. M, male; F, female; MCC, Melbourne Collaborative Cohort Study; SWHS, Shanghai Women's Health Study; JPHC, Japan Public

Health Center-based Prospective Study; HPFS, Health Professionals Follow-up Study; NHS, Nurses' Health Study; PS, Pizarra study; GCS, Golestan Cohort Study; TLGS, Tehran Lipid and Glucose Study; SCHS, Singapore Chinese Health Study; PURE, Prospective Urban Rural Epidemiology Study. No significant differences between groups (p-value, 0.40).



### Supplemental figure 4: Forest-plot of white rice intake and risk of T2D stratified by adjustment for diet quality

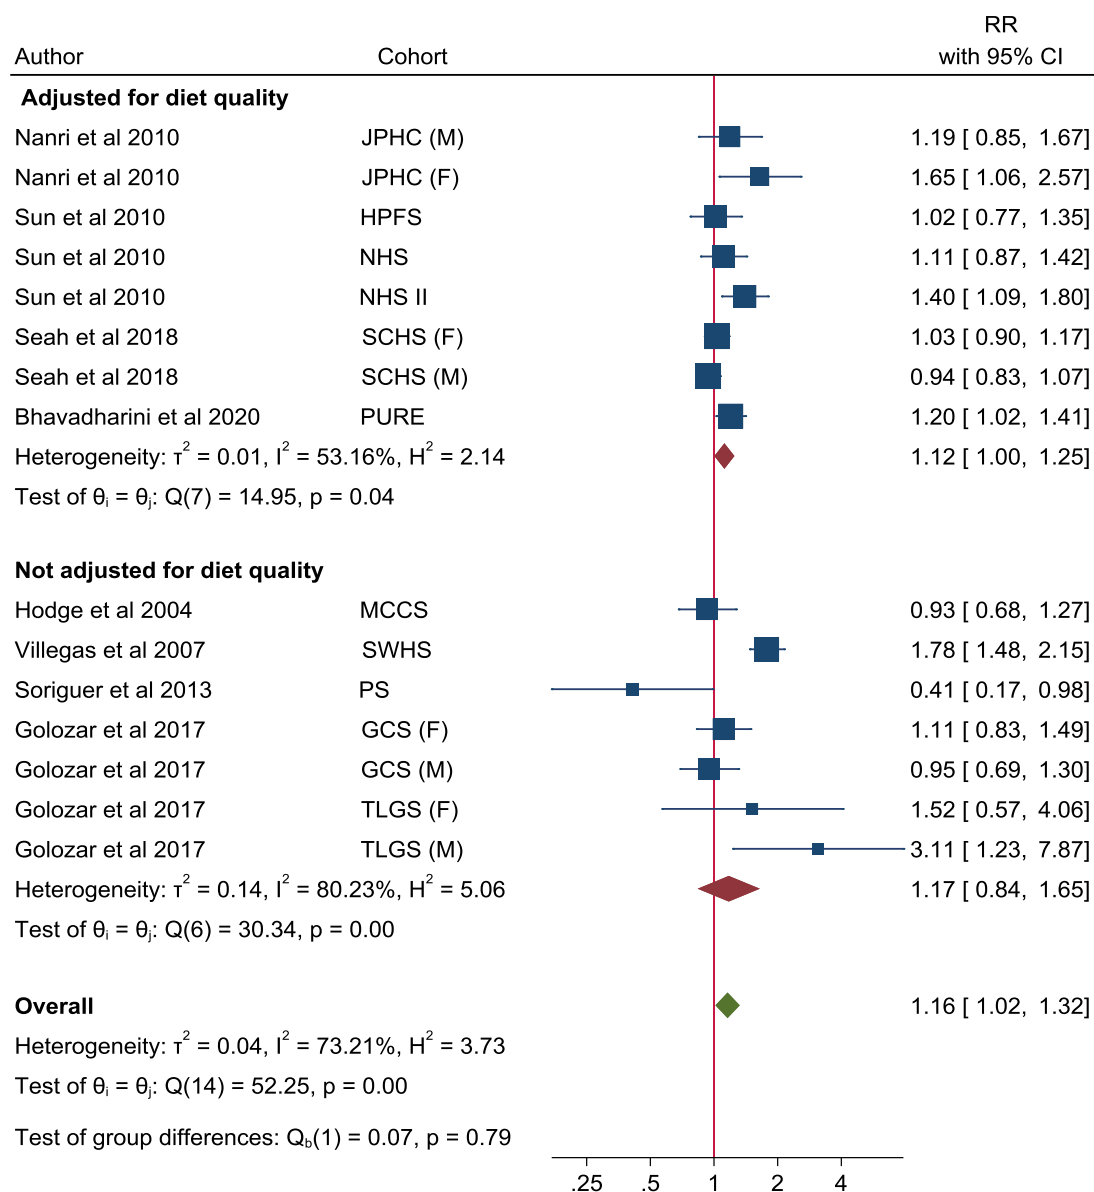

Random-effects DerSimonian-Laird model

Risk of type 2 diabetes (T2D) (RR and 95% CI) comparing extreme categories of white rice intake from prospective cohort studies stratified by adjustment for diet quality and overall. Horizontal lines denote 95% CIs; solid squares represent the point estimate of each study with the size proportional to study weight. Open diamonds represent pooled estimates from the random-effects model (DerSimonian-Laird). Study weights are from the random-effects analysis. The  $I^2$  and P values for heterogeneity are shown. The red line represents unity. M, male; F, female; MCC, Melbourne Collaborative Cohort Study; SWHS, Shanghai Women's Health Study;

JPHC, Japan Public Health Center-based Prospective Study; HPFS, Health Professionals Follow-up Study; NHS, Nurses' Health Study; PS, Pizarra study; GCS, Golestan Cohort Study; TLGS, Tehran Lipid and Glucose Study; SCHS, Singapore Chinese Health Study; PURE, Prospective Urban Rural Epidemiology Study. No significant differences between groups (p-value, 0.81).

### Supplemental figure 5: Forest-plot of white rice intake and risk of T2D stratified by geographic region

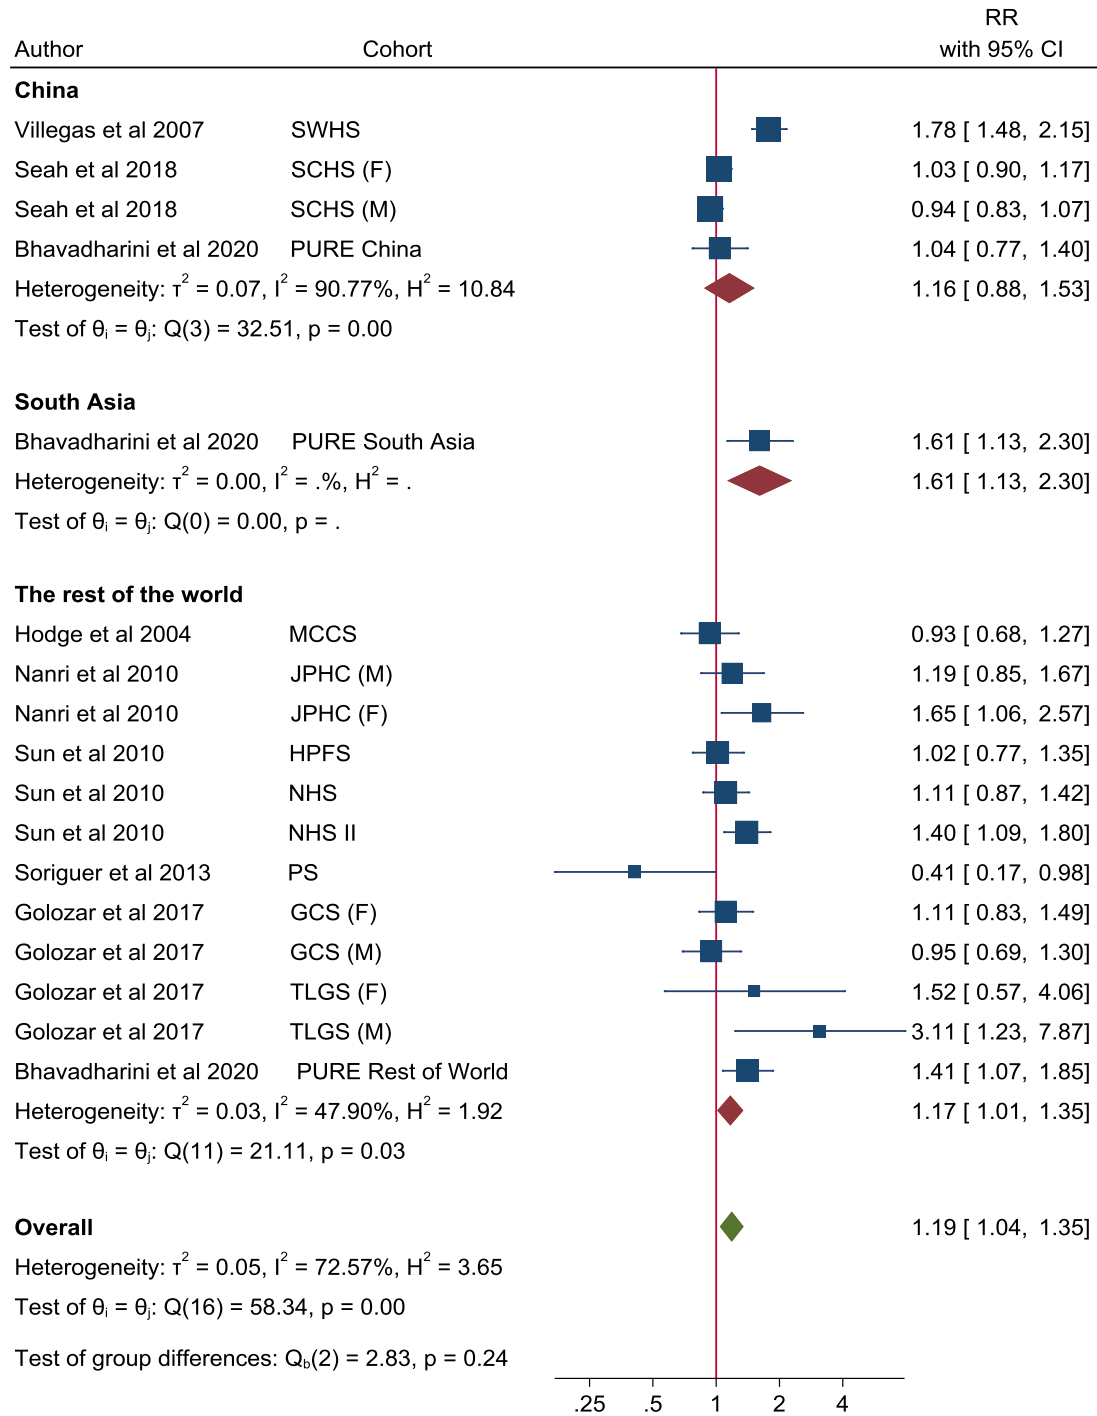

Risk of type 2 diabetes (T2D) (RR and 95% CI) comparing extreme categories of white rice intake from prospective cohort studies stratified by geographic region based on the categorization in Bhavadharini et al 2020<sup>13</sup>. Horizontal lines denote 95% CIs; solid squares represent the point estimate of each study with the size proportional to study weight. Open diamonds represent pooled estimates from the random-effects model (DerSimonian-Laird). Study weights are from the random-effects analysis. The  $I^2$  and P values for heterogeneity are shown. The red line represents unity. M, male; F, female; MCC, Melbourne Collaborative Cohort Study; SWHS, Shanghai Women's Health Study; JPHC, Japan Public Health Center-based Prospective Study; HPFS, Health Professionals Follow-up Study; NHS, Nurses' Health Study; PS, Pizarra study; GCS, Golestan Cohort Study; TLGS, Tehran Lipid and Glucose Study; SCHS, Singapore Chinese Health Study; PURE, Prospective Urban Rural Epidemiology Study. No significant differences between groups (p-value, 0.99).

### Supplemental figure 6: Forest-plot of white rice intake and risk of T2D stratified by typical rice consuming habits

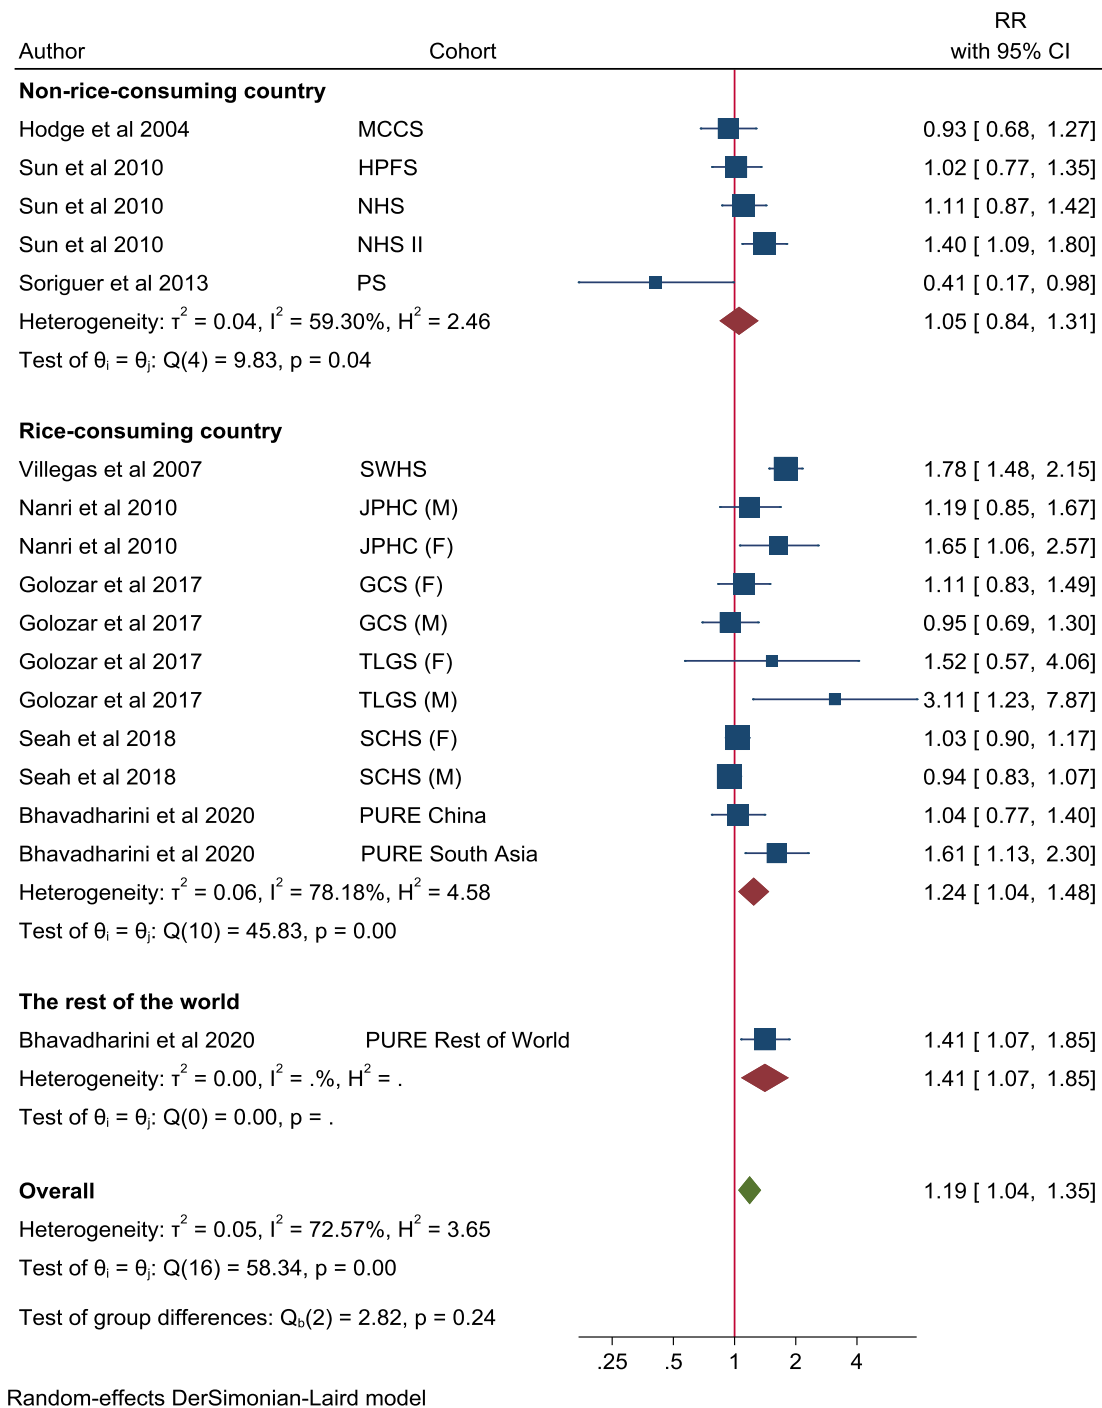

Risk of type 2 diabetes (T2D) (RR and 95% CI) comparing extreme categories of white rice intake from prospective cohort studies stratified by typical rice consumption habits. Horizontal lines denote 95% CIs; solid squares represent the point estimate of each study with the size proportional to study weight. Open diamonds represent pooled estimates from the random-effects model (DerSimonian-Laird). Study weights are from the random-effects analysis. The  $I^2$  and P values for heterogeneity are shown. The red line represents unity. M, male; F, female; MCC, Melbourne Collaborative Cohort Study; SWHS, Shanghai Women's Health Study; JPHC, Japan Public Health Center-based Prospective Study; HPFS, Health Professionals Follow-up Study; NHS, Nurses' Health Study; PS, Pizarra study; GCS, Golestan Cohort Study; TLGS, Tehran Lipid and Glucose Study; SCHS, Singapore Chinese Health Study; PURE, Prospective Urban Rural Epidemiology Study. No significant differences between groups (p-value, 0.23).

### Supplemental Figure 7: Fixed-effects cubic spline for intake of white rice in relation to risk of T2D stratified by geographical region.

Dose-response plot of White Rice Consumption by Geographic Region

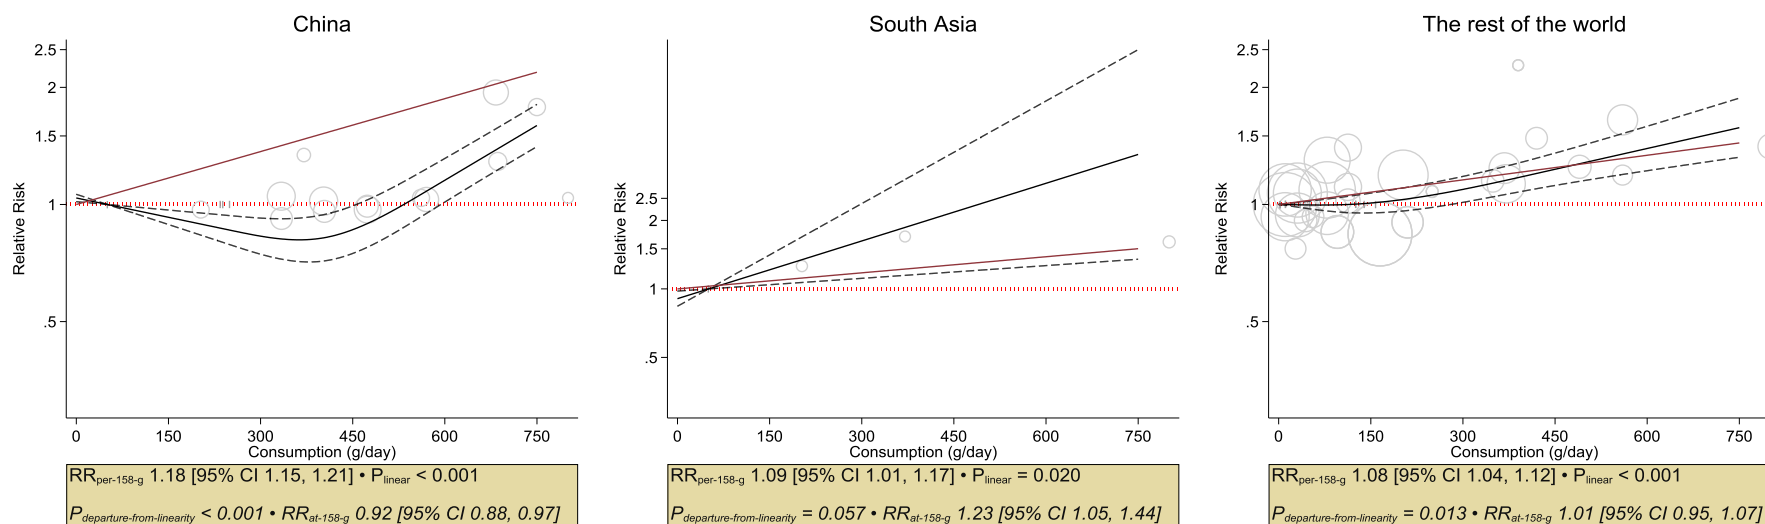

Fixed-effects cubic spline for intake of white rice in relation to risk of T2D stratified by geographic region. One-stage fixed-effects dose-response model using restricted cubic splines was applied for the analysis of studies conducted in China and the rest of the world. One-stage fixed-effects dose-response model assuming a linear trend was fitted for the analysis of studies conducted in South Asia due to the limited number of observations. Black solid line represents the point estimates and the black dashed lines represent the corresponding 95% CI's. The red solid line indicates the exact linear relationship and red dashed line represents unity. Four cohorts were from China: SWHS (Villegas 2007), SCHS (Seah 2018, for both male and female), PURE (Bhavadarini 2020, China subgroup). One cohort, PURE (Bhavadarini 2020, South Asia subgroup) was from South Asia. Thirteen cohorts were included in the rest of the world: MCCS (Hodge 2004), JPHC (Nanri 2010, for both male and female), HPFS (Sun 2010), NHS (Sun 2010), NHS II (Sun 2010), PS (Soriquer 2013), GCS (Golozar 2017, for both male and female), TLGS (Golozar 2017, for both male and female), PURE (Bhavadarini 2020, The rest of the world subgroup).

### Supplemental Figure 8: Fixed-effects cubic spline for intake of white rice in relation to risk of T2D stratified by rice consumption habits of region

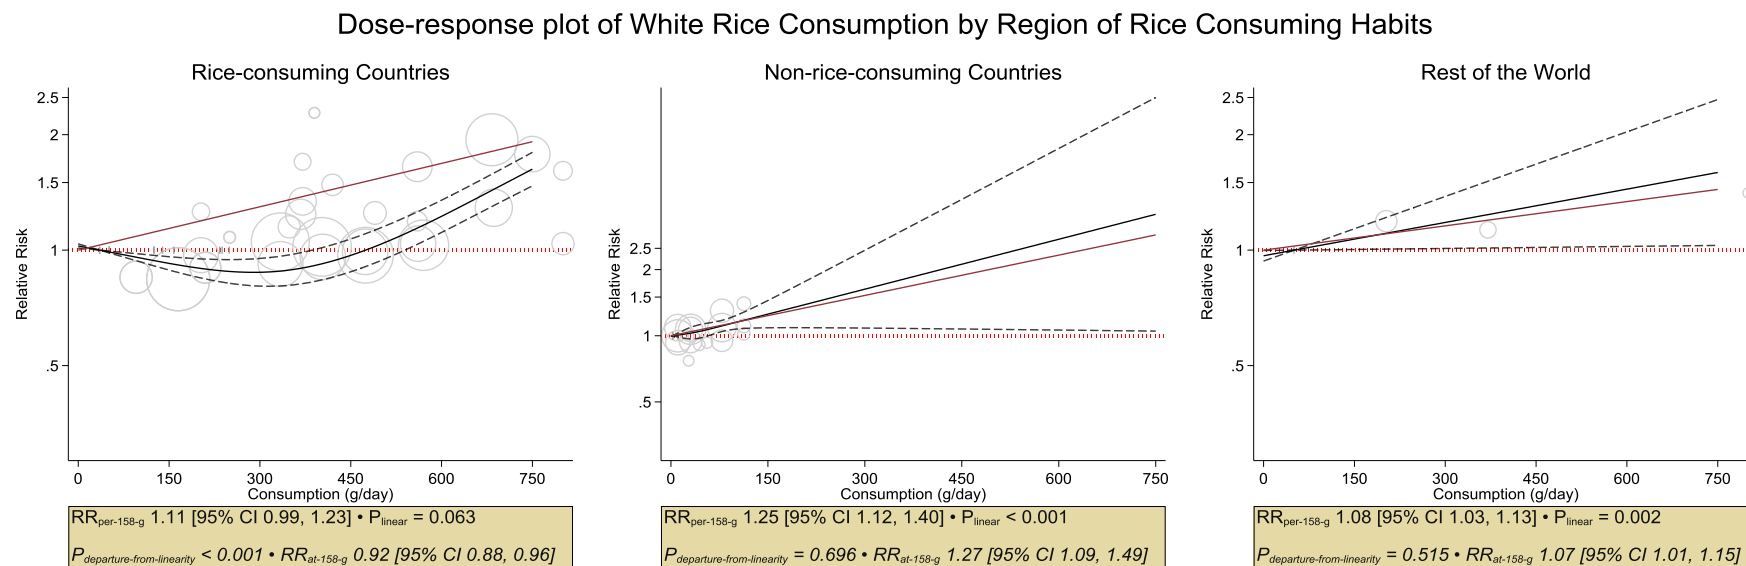

Fixed-effects cubic spline for intake of white rice in relation to risk of T2D stratified by rice consumption habits of region. One-stage fixed-effects dose-response model using restricted cubic splines was applied for the analyses in rice-consuming countries and non-rice-consuming countries. One-stage fixed-effects dose-response model assuming a linear trend was fitted for the analysis in the rest of the world due to the limited number of observations. Black solid line represents the point estimates and the black dashed lines represent the corresponding 95% CI's. The red solid line indicates the exact linear relationship and red dashed line represents unity. Eleven cohorts were from rice-consuming countries: SWHS (Villegas 2007), JPHC (Nanri 2010, for both male and female), GCS (Golozar 2017, for both male and female), TLGS (Golozar 2017, for both male and female), SCHS (Seah 2018, for both male and female), PURE (Bhavadarini 2020, subgroups of China and South Asia). Five cohorts were from non-rice-consuming countries: MCCS (Hodge 2004), HPFS (Sun 2010), NHS (Sun 2010), NHS II (Sun 2010), PS (Soriquer 2013). One cohort was from the rest of world: PURE (Bhavadarini 2020, The rest of the world subgroup).



### Supplemental figure 9: Forest plot of mean difference in high-density lipoprotein cholesterol level between white rice and brown rice groups in RCTs.

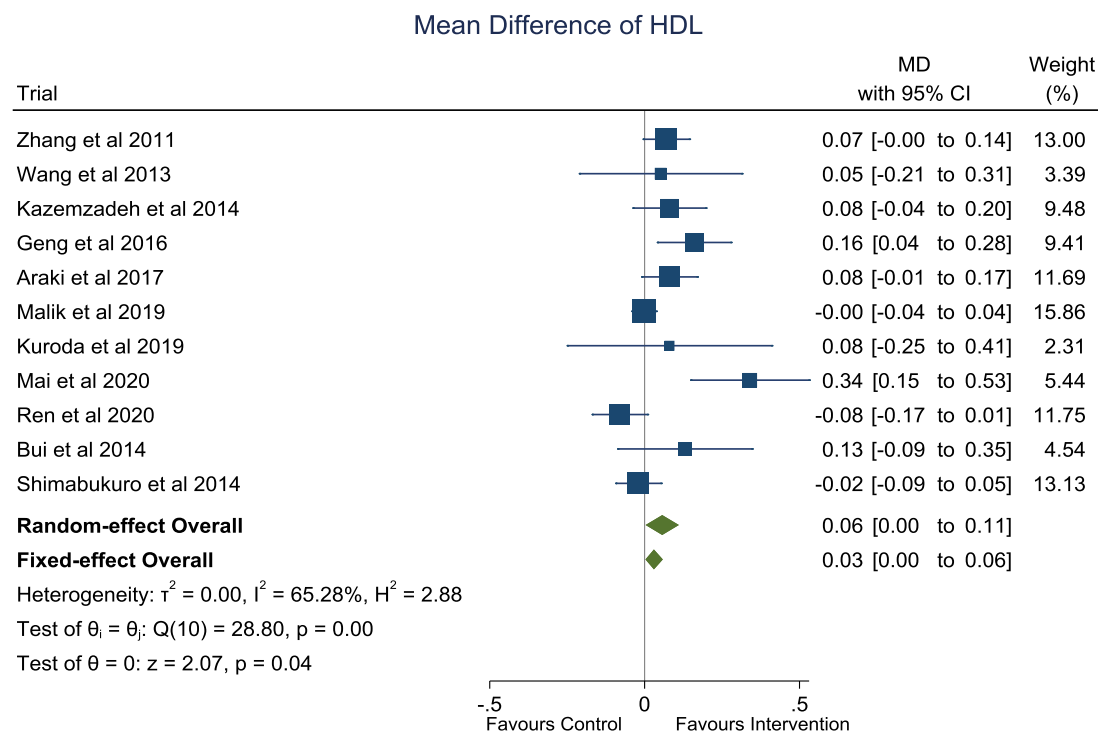

Random-effects DerSimonian-Laird model

Mean difference in change from baseline (95% CI) of HDL-cholesterol (mmol/L) between brown rice and white rice (control) regimens from RCTs. Trials evaluated the effect of replacing white rice with brown rice. Horizontal lines denote 95% CIs; solid squares represent the point estimate of each study with the size proportional to study weight. Open diamonds represent pooled estimates from the random-effects model (DerSimonian-Laird) and fixed-effects model. Study weights are from the random-effects analysis. The  $I^2$  and P values for heterogeneity are shown.

### Supplemental figure 10: Forest plot of mean difference in systolic blood pressure between white rice and brown rice groups in RCTs

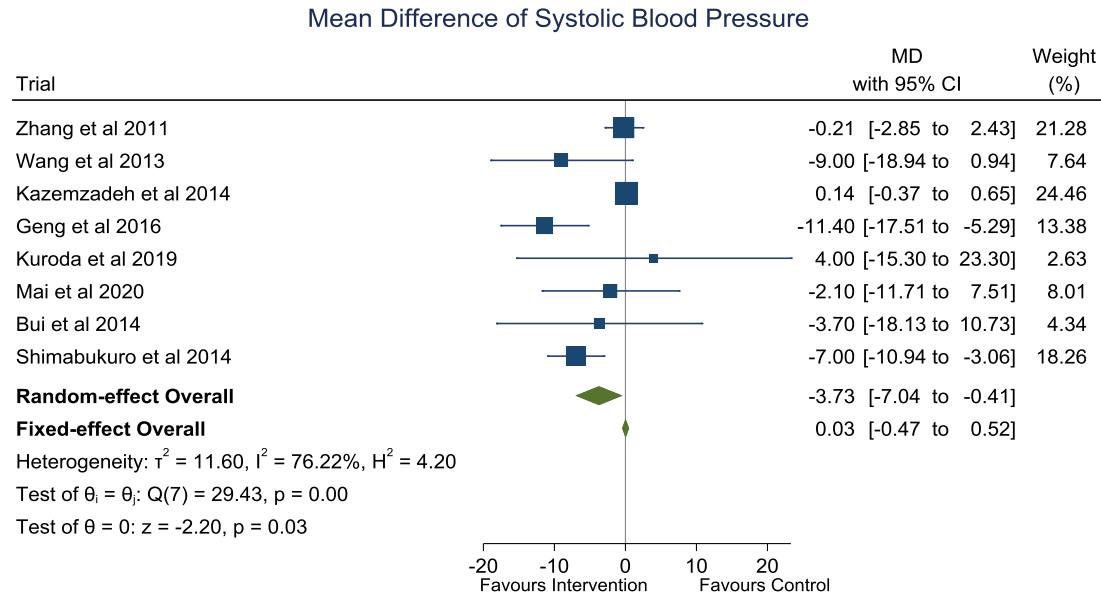

Random-effects DerSimonian-Laird model

Mean difference in change from baseline (95% CI) of systolic blood pressure (mmHg) between brown rice and white rice (control) regimens from RCTs. Trials evaluated the effect of replacing white rice with brown rice. Horizontal lines denote 95% CIs; solid squares represent the point estimate of each study with the size proportional to study weight. Open diamonds represent pooled estimates from the random-effects model (DerSimonian-Laird) and fixed-effects model. Study weights are from the random-effects analysis. The  $I^2$  and P values for heterogeneity are shown.

### Supplemental figure 11: Forest plot of mean difference in diastolic blood pressure between white rice and brown rice groups in RCTs

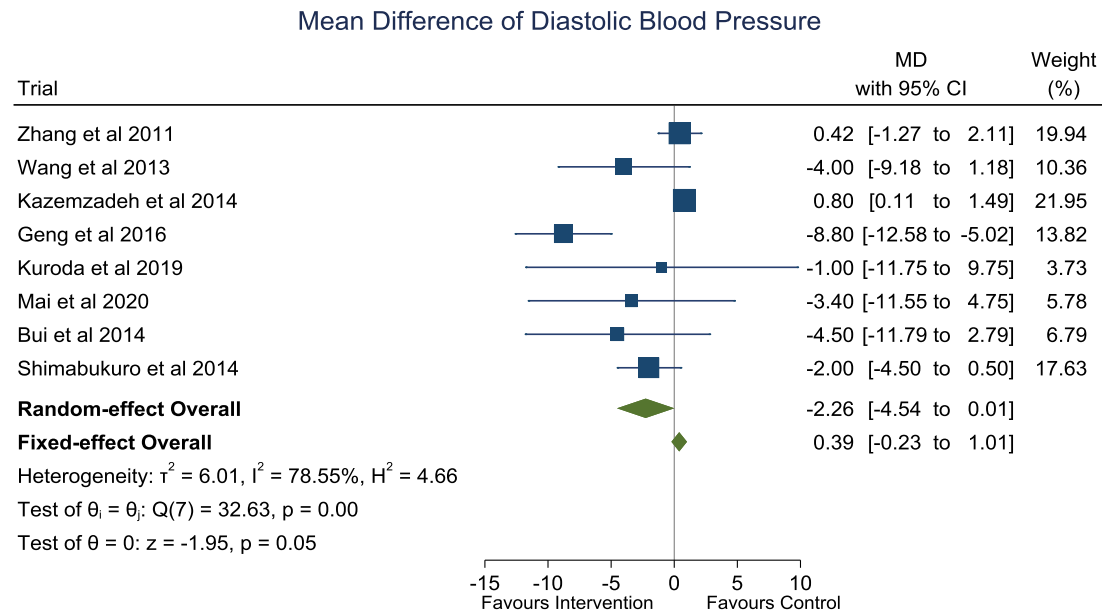

Random-effects DerSimonian-Laird model

Mean difference in change from baseline (95% CI) of diastolic blood pressure (mmHg) between brown rice and white rice (control) regimens from RCTs. Trials evaluated the effect of replacing white rice with brown rice. Horizontal lines denote 95% CIs; solid squares represent the point estimate of each study with the size proportional to study weight. Open diamonds represent pooled estimates from the random-effects model (DerSimonian-Laird) and fixed-effects model. Study weights are from the random-effects analysis. The  $I^2$  and  $P$  values for heterogeneity are shown.

**Supplemental figure 12: Forest plot of mean difference in insulin resistance, HOMA-IR between white rice and brown rice groups in RCTs.**

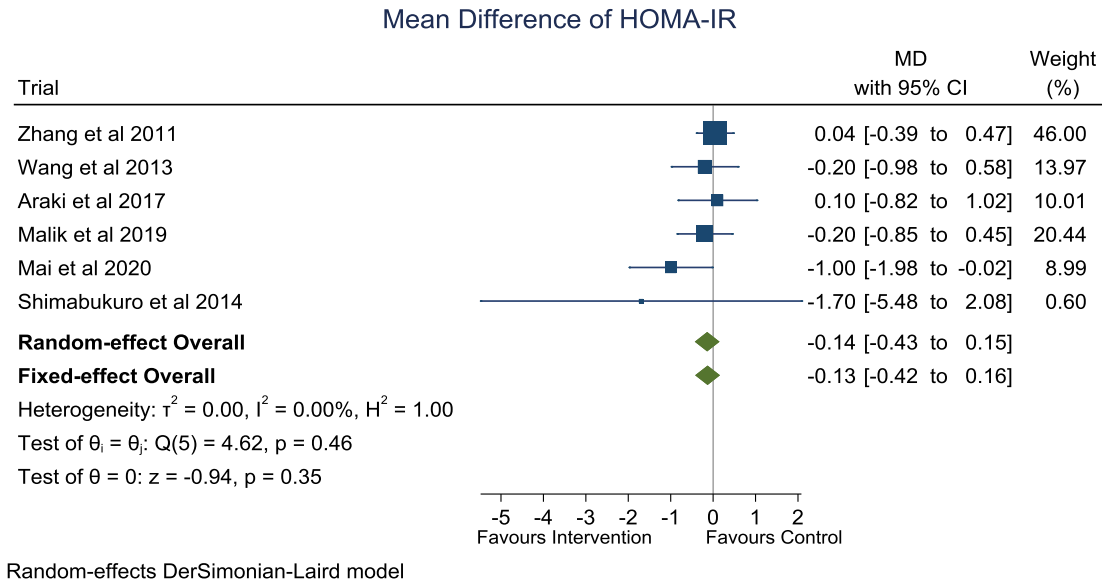

Mean difference in change from baseline (95% CI) of insulin resistance, HOMA-IR between brown rice and white rice (control) regimens from RCTs. Trials evaluated the effect of replacing white rice with brown rice. Horizontal lines denote 95% CIs; solid squares represent the point estimate of each study with the size proportional to study weight. Open diamonds represent pooled estimates from the random-effects model (DerSimonian-Laird) and fixed-effects model. Study weights are from the random-effects analysis. The  $I^2$  and P values for heterogeneity are shown.

### Supplemental figure 13: Forest plot of mean difference in total cholesterol between white rice and brown rice groups in RCTs.

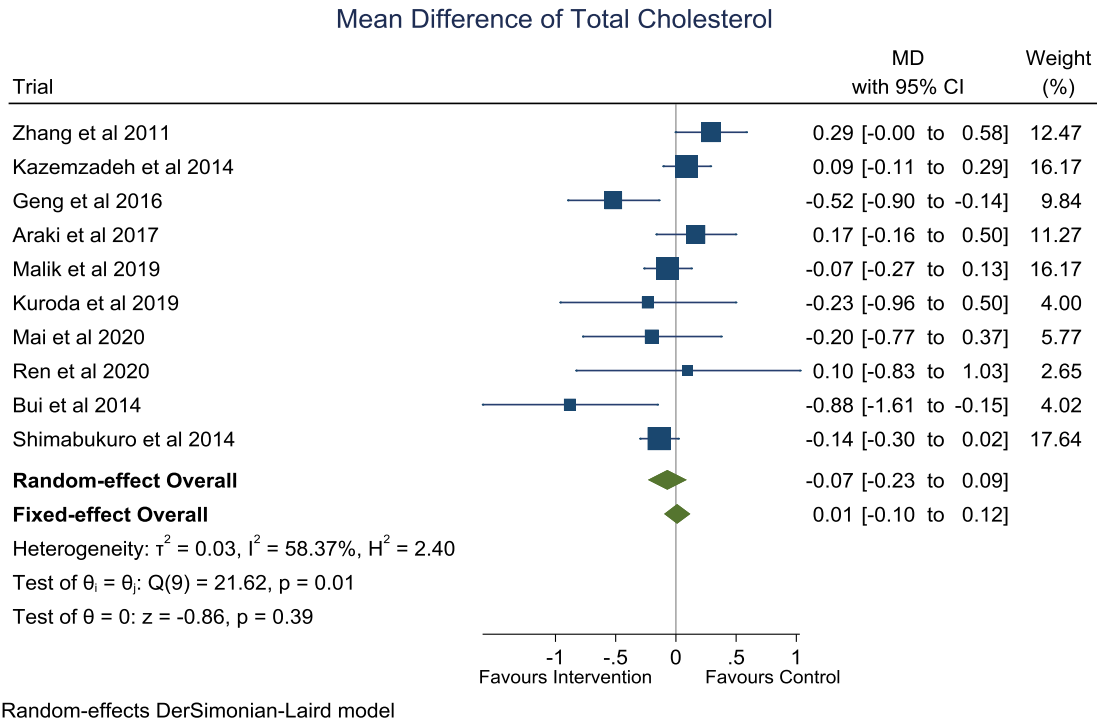

Mean difference in change from baseline (95% CI) of total cholesterol (mmol/L) between brown rice and white rice (control) regimens from RCTs. Trials evaluated the effect of replacing white rice with brown rice. Horizontal lines denote 95% CIs; solid squares represent the point estimate of each study with the size proportional to study weight. Open diamonds represent pooled estimates from the random-effects model (DerSimonian-Laird) and fixed-effects model. Study weights are from the random-effects analysis. The  $I^2$  and P values for heterogeneity are shown.

### Supplemental figure 14: Forest plot of mean difference in HbA1c between white rice and brown rice groups in RCTs

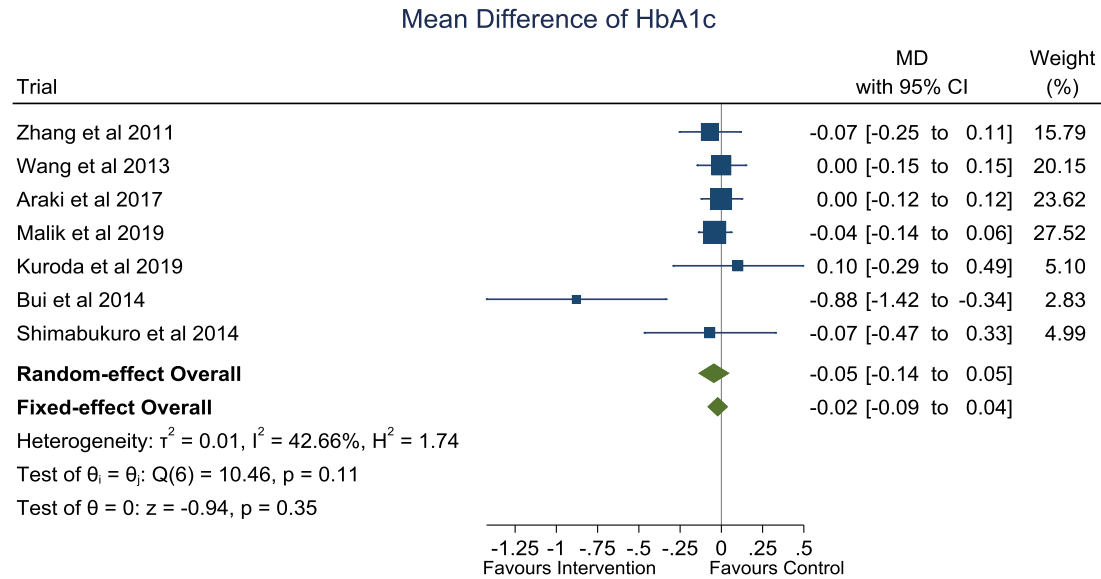

Random-effects DerSimonian-Laird model

Mean difference in change from baseline (95% CI) of HbA1c (%) between brown rice and white rice (control) regimens from RCTs. Trials evaluated the effect of replacing white rice with brown rice. Horizontal lines denote 95% CIs; solid squares represent the point estimate of each study with the size proportional to study weight. Open diamonds represent pooled estimates from the random-effects model (DerSimonian-Laird) and fixed-effects model. Study weights are from the random-effects analysis. The  $I^2$  and P values for heterogeneity are shown.

### Supplemental figure 15: Forest plot of mean difference in triglycerides between white rice and brown rice groups in RCTs

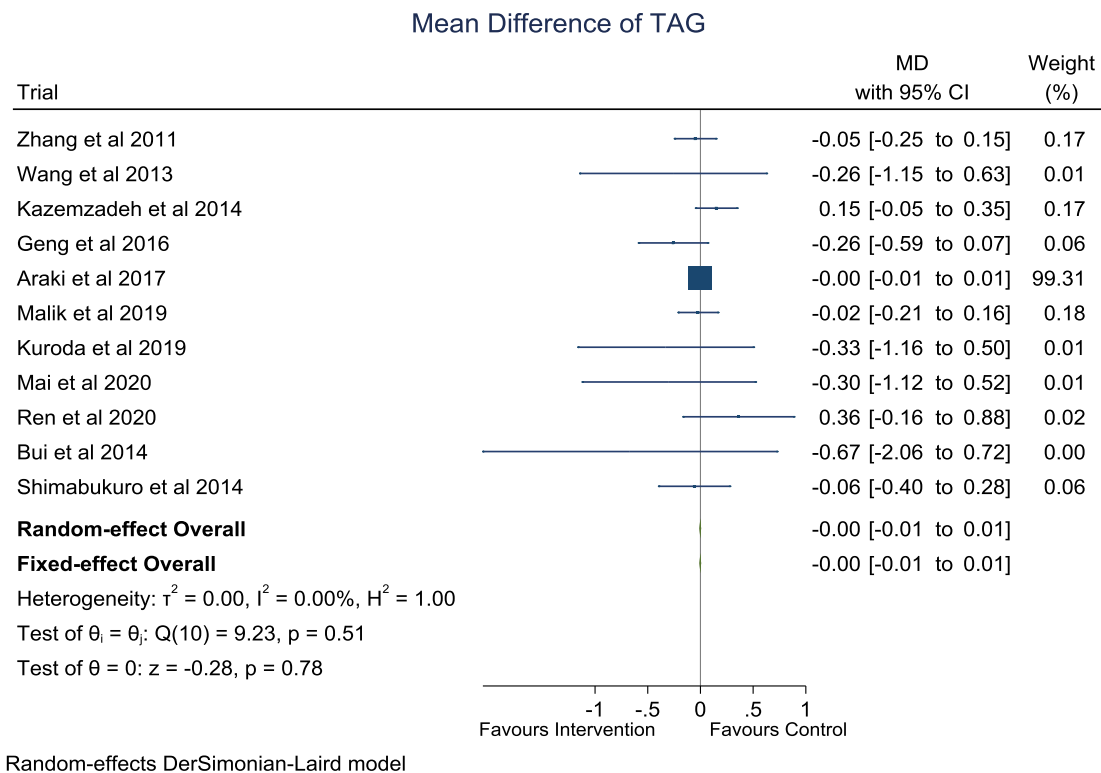

Mean difference in change from baseline (95% CI) of triglycerides (mmol/L) between brown rice and white rice (control) regimens from RCTs. Trials evaluated the effect of replacing white rice with brown rice. Horizontal lines denote 95% CIs; solid squares represent the point estimate of each study with the size proportional to study weight. Open diamonds represent pooled estimates from the random-effects model (DerSimonian-Laird) and fixed-effects model. Study weights are from the random-effects analysis. The  $I^2$  and P values for heterogeneity are shown.

### Supplemental figure 16: Forest plot of mean difference in LDL-cholesterol between white rice and brown rice groups in RCTs

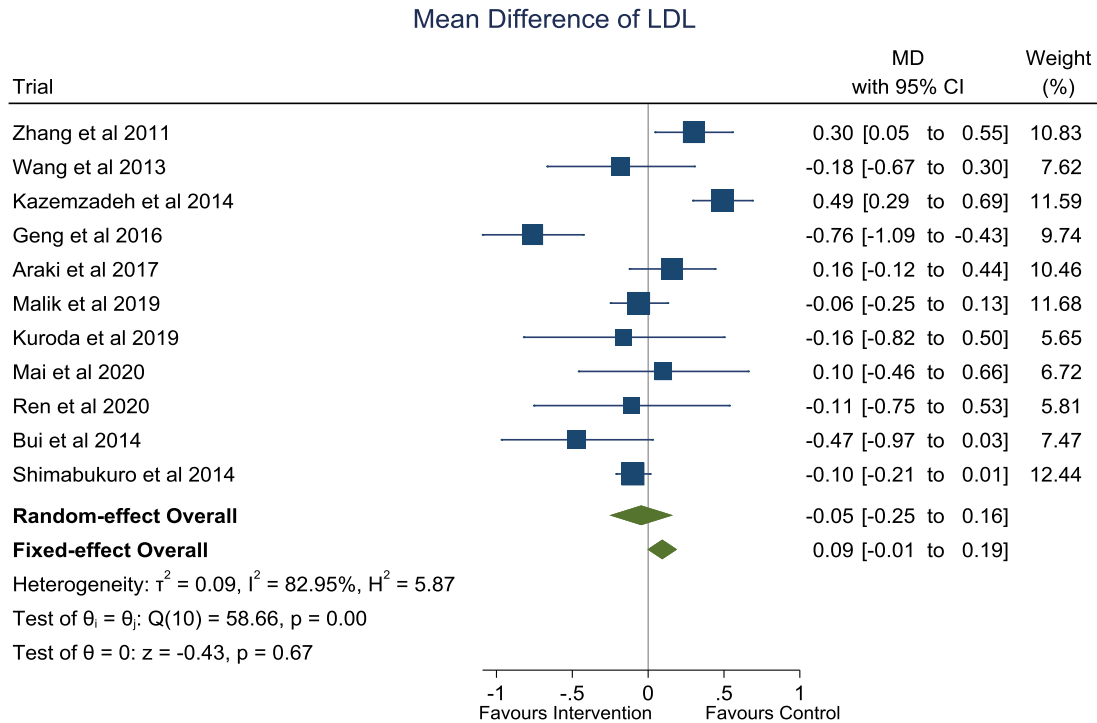

Random-effects DerSimonian-Laird model

Mean difference in change from baseline (95% CI) of LDL-cholesterol (mmol/L) between brown rice and white rice (control) regimens from RCTs. Trials evaluated the effect of replacing white rice with brown rice. Horizontal lines denote 95% CIs; solid squares represent the point estimate of each study with the size proportional to study weight. Open diamonds represent pooled estimates from the random-effects model (DerSimonian-Laird) and fixed-effects model. Study weights are from the random-effects analysis. The  $I^2$  and P values for heterogeneity are shown.



### Supplemental figure 17: Forest plot of mean difference in fasting blood glucose (FBG) between white rice and brown rice groups in RCTs

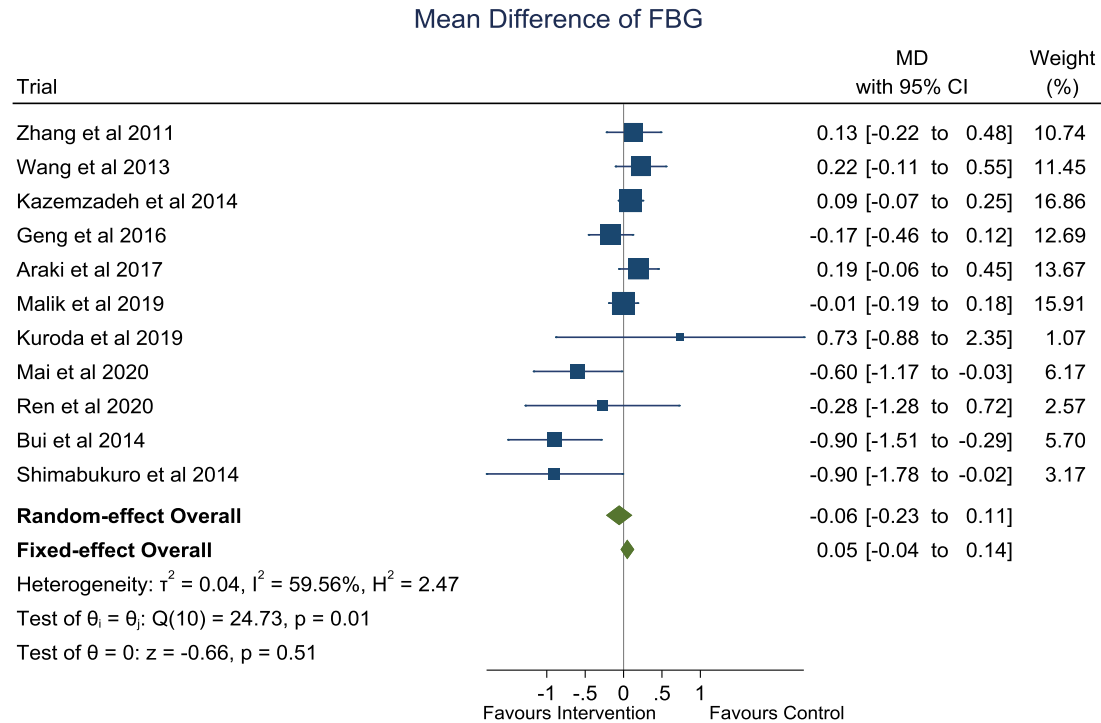

Random-effects DerSimonian-Laird model

Mean difference in change from baseline (95% CI) of fasting blood glucose (FBG) (mmol/L) between brown rice and white rice (control) regimens from RCTs. Trials evaluated the effect of replacing white rice with brown rice. Horizontal lines denote 95% CIs; solid squares represent the point estimate of each study with the size proportional to study weight. Open diamonds represent pooled estimates from the random-effects model (DerSimonian-Laird) and fixed-effects model. Study weights are from the random-effects analysis. The  $I^2$  and P values for heterogeneity are shown.

### Supplemental figure 18: Forest plot of mean difference in waist circumference between white rice and brown rice groups in RCTs

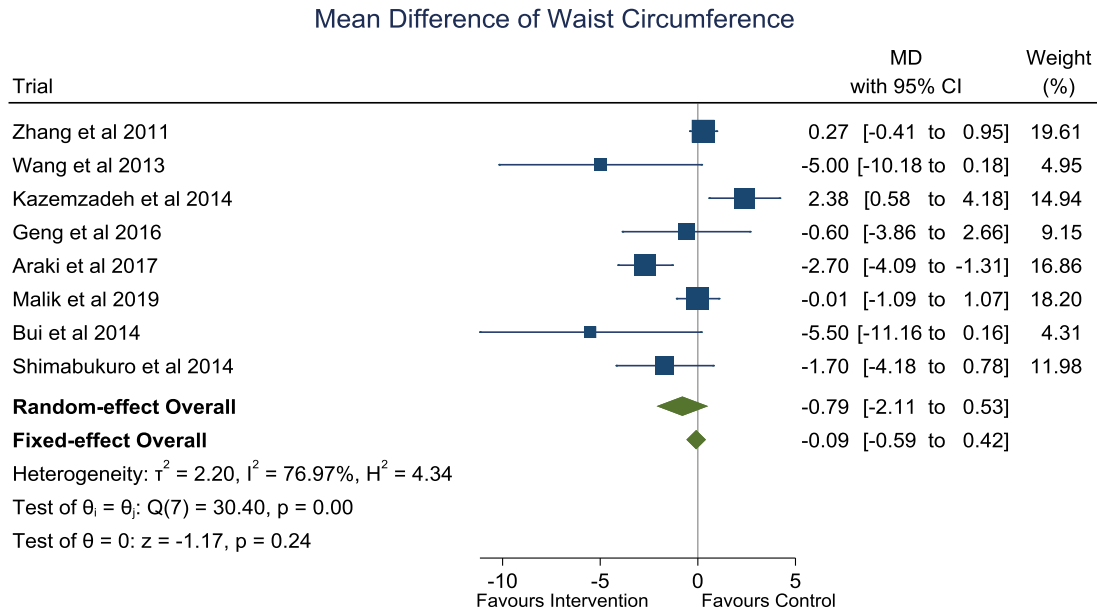

Mean difference in change from baseline (95% CI) in waist circumference (cm) between brown rice and white rice (control) regimens from RCTs. Trials evaluated the effect of replacing white rice with brown rice. Horizontal lines denote 95% CIs; solid squares represent the point estimate of each study with the size proportional to study weight. Open diamonds represent pooled estimates from the random-effects model (DerSimonian-Laird) and fixed-effects model. Study weights are from the random-effects analysis. The  $I^2$  and P values for heterogeneity are shown.

### Supplemental figure 19: Influence analysis of individual prospective cohort studies in the meta-analysis of white rice intake and risk of T2D

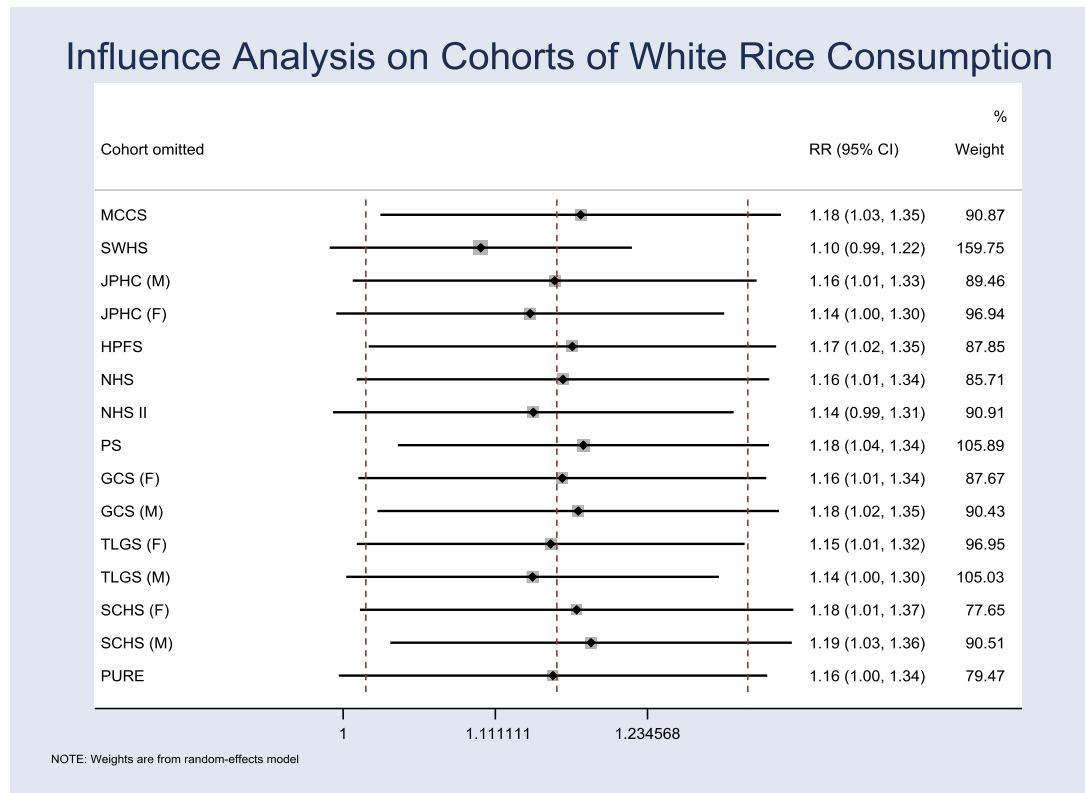

Influence of individual cohorts on the pooled RR of white rice intake and risk of T2D. The squares with the horizontal lines represent the pooled RR and corresponding 95% CI with the removal of the individual cohorts. The vertical dashed lines indicate the lower 95% CI, overall pooled RR, and upper 95% CI (from left to right). M, male; F, female; MCC, Melbourne Collaborative Cohort Study; SWHS, Shanghai Women's Health Study; JPHC, Japan Public Health Center-based Prospective Study; HPFS, Health Professionals Follow-up Study; NHS, Nurses' Health Study; PS, Pizarra study; GCS, Golestan Cohort Study; TLGS, Tehran Lipid and Glucose Study; SCHS, Singapore Chinese Health Study; PURE, Prospective Urban Rural Epidemiology Study. Weights are from the random-effects model and represent the percent weight of the effect estimate after an individual study has been removed relative to the overall summary estimate.

### Supplemental figure 20: Influence analysis of individual RCTs replacing white rice with brown rice in the meta-analysis of FBG

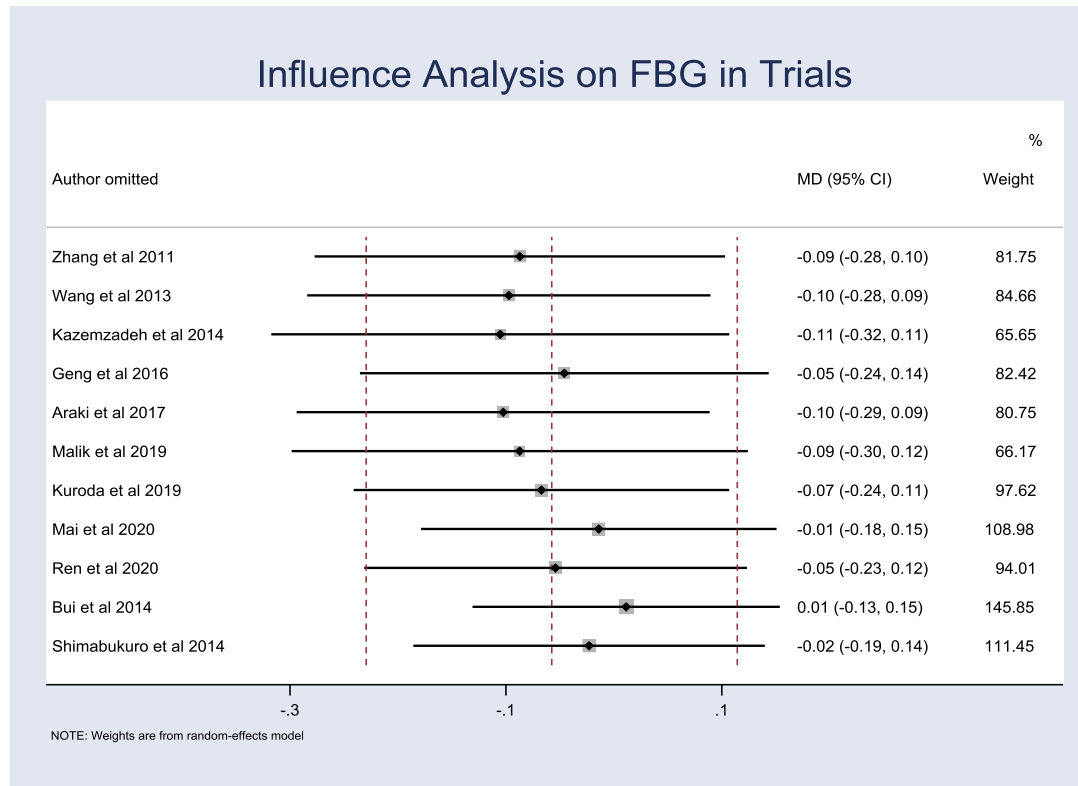

Influence of individual RCTs on the pooled estimate for fasting blood glucose (FBG). The squares with the horizontal lines represent the pooled estimate and corresponding 95% CI with the removal of the individual RCTs. The vertical dashed lines indicate the lower 95% CI, overall pooled estimate, and upper 95% CI (from left to right). Weights are from the random-effects model and represent the percent weight of the effect estimate after an individual study has been removed relative to the overall summary estimate.

### Supplemental figure 21: Influence analysis of individual RCTs replacing white rice with brown rice in the meta-analysis of HDL cholesterol

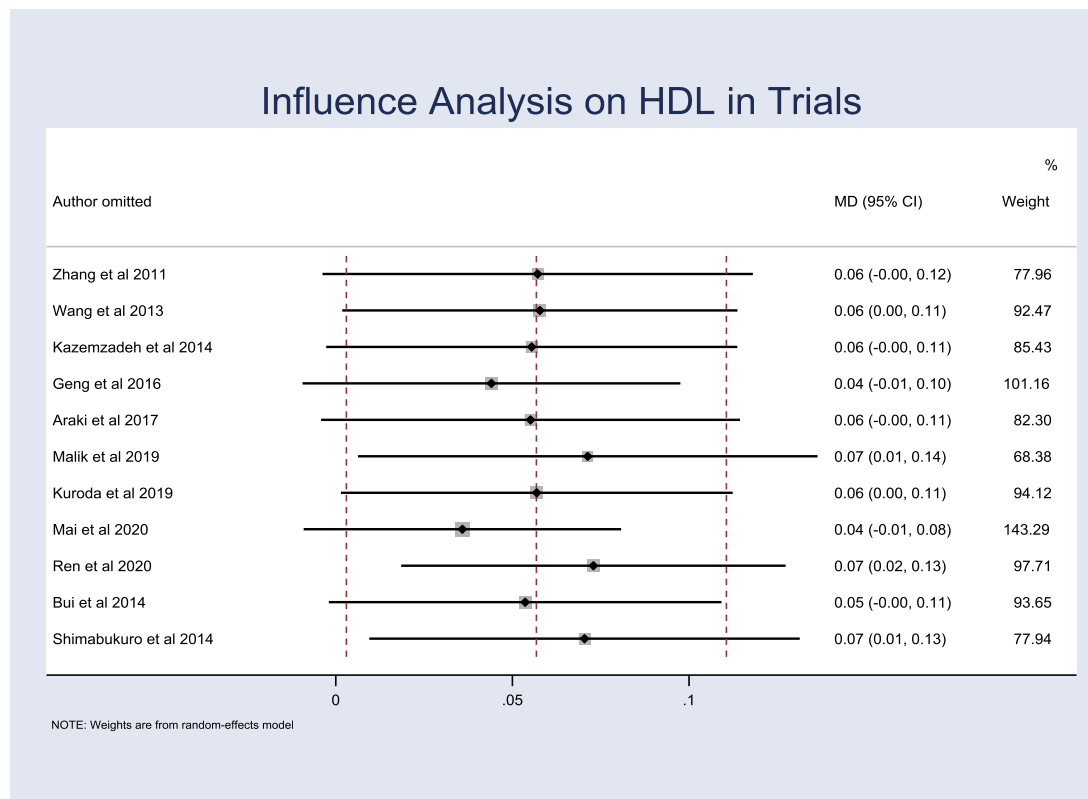

Influence of individual RCTs on the pooled estimate for HDL cholesterol. The squares with the horizontal lines represent the pooled estimate and corresponding 95% CI with the removal of the individual RCTs. The vertical dashed lines indicate the lower 95% CI, overall pooled estimate, and upper 95% CI (from left to right). Weights are from the random-effects model and represent the percent weight of the effect estimate after an individual study has been removed relative to the overall summary estimate.

### Supplemental figure 22: Influence analysis of individual RCTs replacing white rice with brown rice in the meta-analysis of LDL cholesterol

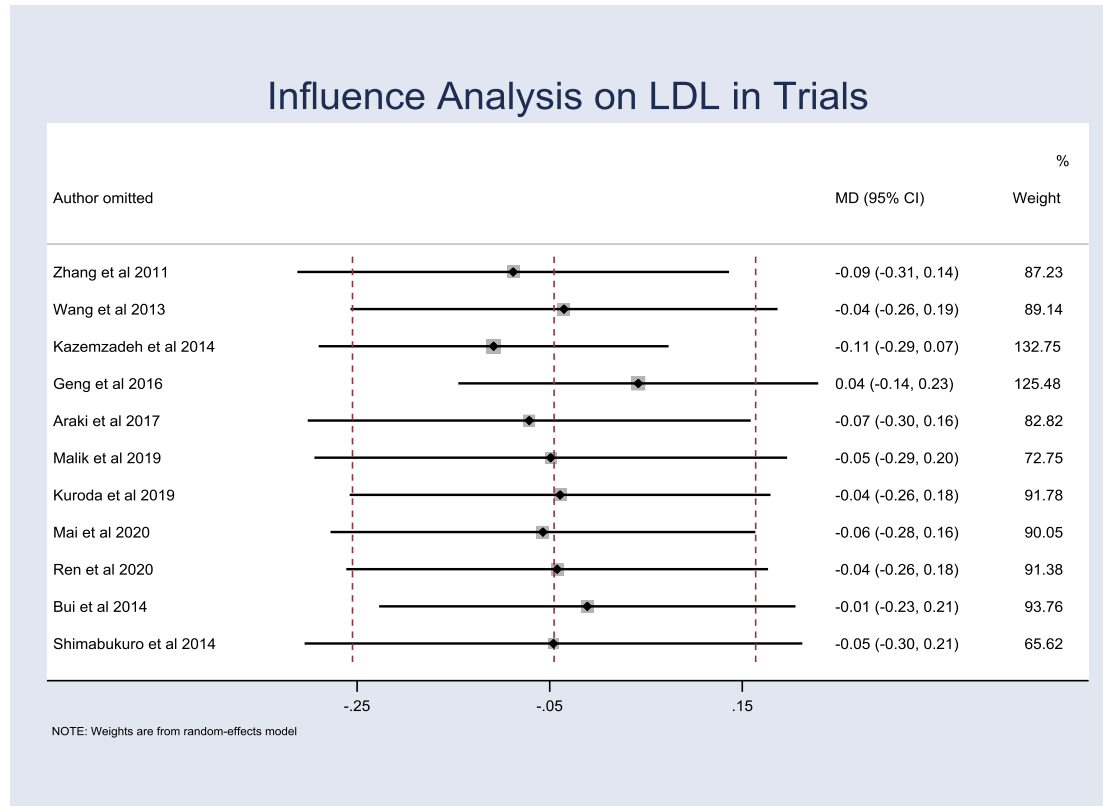

Influence of individual RCTs on the pooled estimate for LDL cholesterol. The squares with the horizontal lines represent the pooled estimate and corresponding 95% CI with the removal of the individual RCTs. The vertical dashed lines indicate the lower 95% CI, overall pooled estimate, and upper 95% CI (from left to right). Weights are from the random-effects model and represent the percent weight of the effect estimate after an individual study has been removed relative to the overall summary estimate.

### Supplemental figure 23: Influence analysis of individual RCTs replacing white rice with brown rice in the meta-analysis of triglycerides

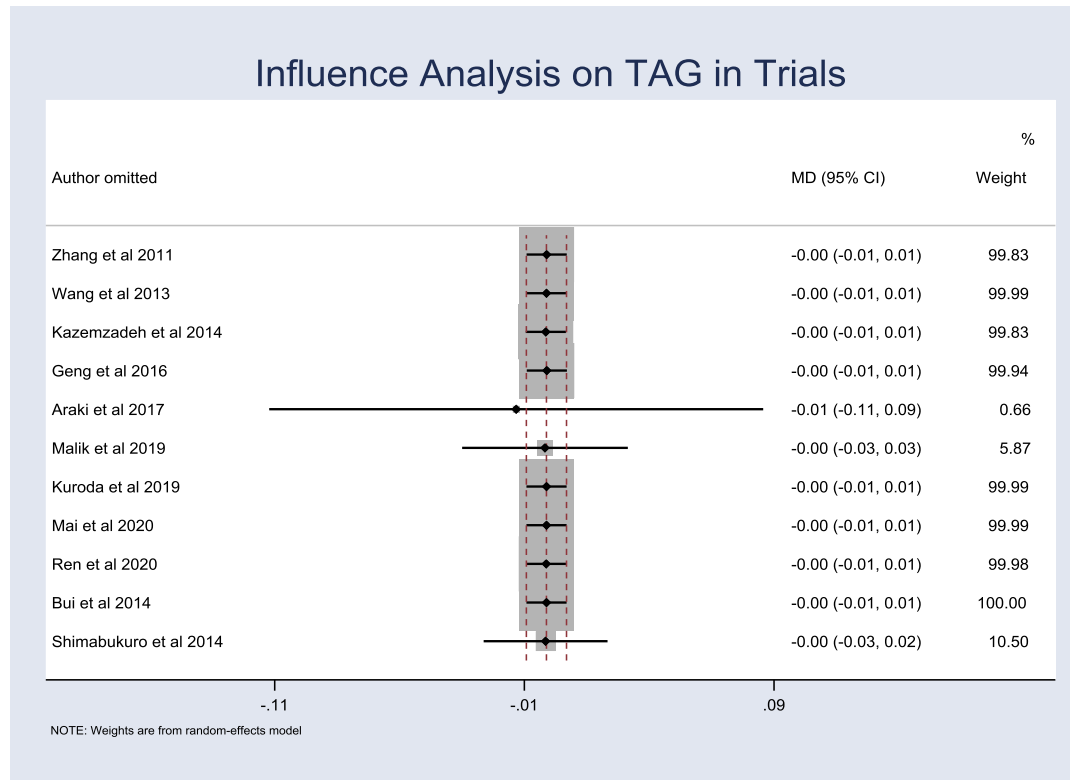

Influence of individual RCTs on the pooled estimate for triglycerides (TAG). The squares with the horizontal lines represent the pooled estimate and corresponding 95% CI with the removal of the individual RCTs. The vertical dashed lines indicate the lower 95% CI, overall pooled estimate, and upper 95% CI (from left to right). Weights are from the random-effects model and represent the percent weight of the effect estimate after an individual study has been removed relative to the overall summary estimate.

**Supplemental figure 24: Funnel plot for meta-analysis of prospective cohort studies of white rice (WR) intake and risk of T2D**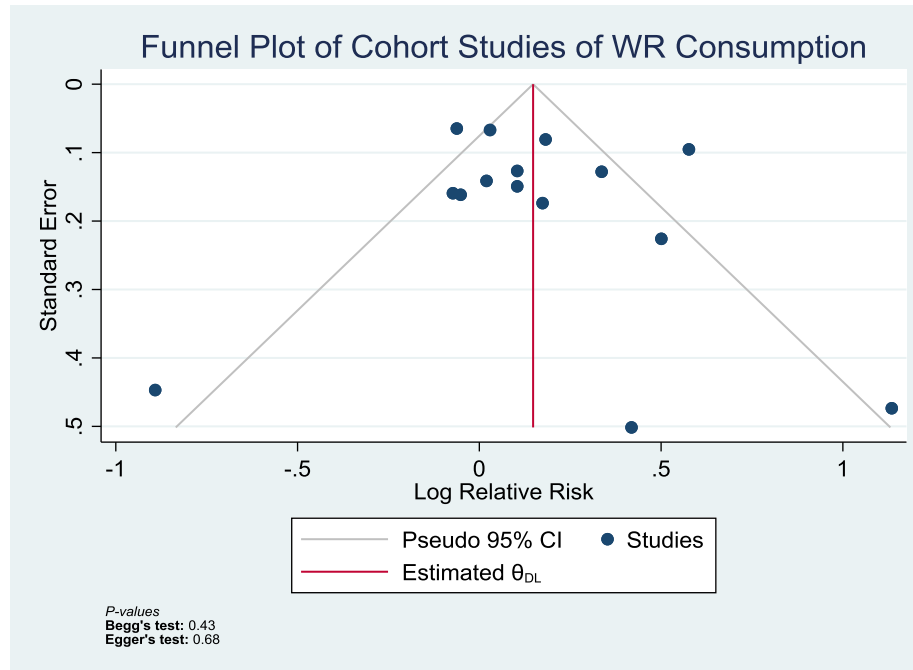

Funnel plot and corresponding Begg's and Egger's test for assessment of potential publication bias in meta-analysis of prospective cohort studies of white rice (WR) consumption and risk of T2D.



**Supplemental figure 25: Funnel plot for meta-analysis of RCTs replacing white rice with brown rice for FBG**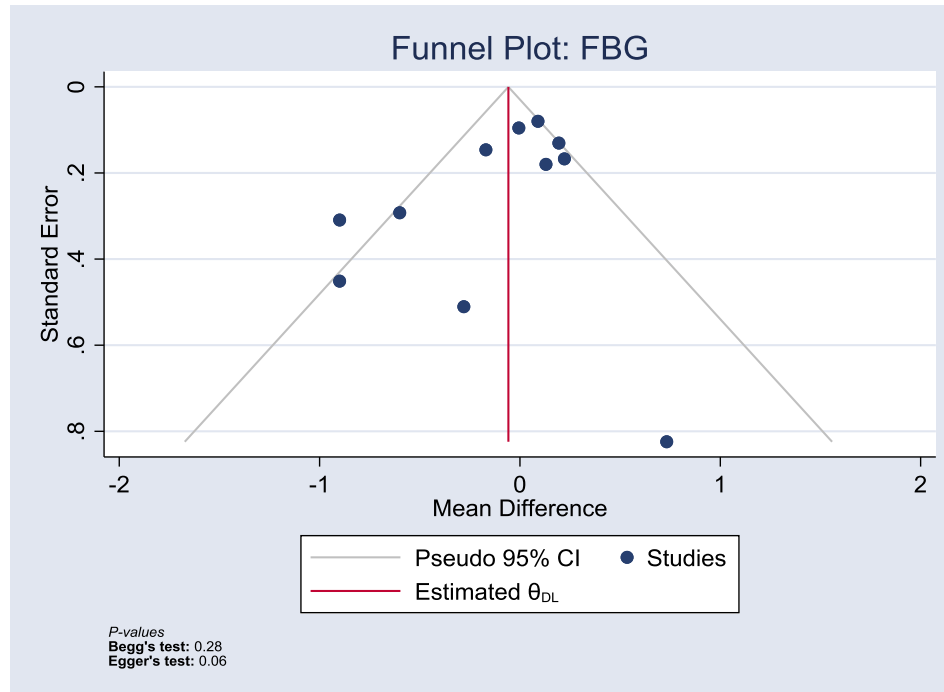

Funnel plot and corresponding Begg's and Egger's test for assessment of potential publication bias in meta-analysis of RCTs replacing white rice with brown rice for fasting blood glucose (FBG).

**Supplemental figure 26: Funnel plot for meta-analysis of RCTs replacing white rice with brown rice for HDL cholesterol**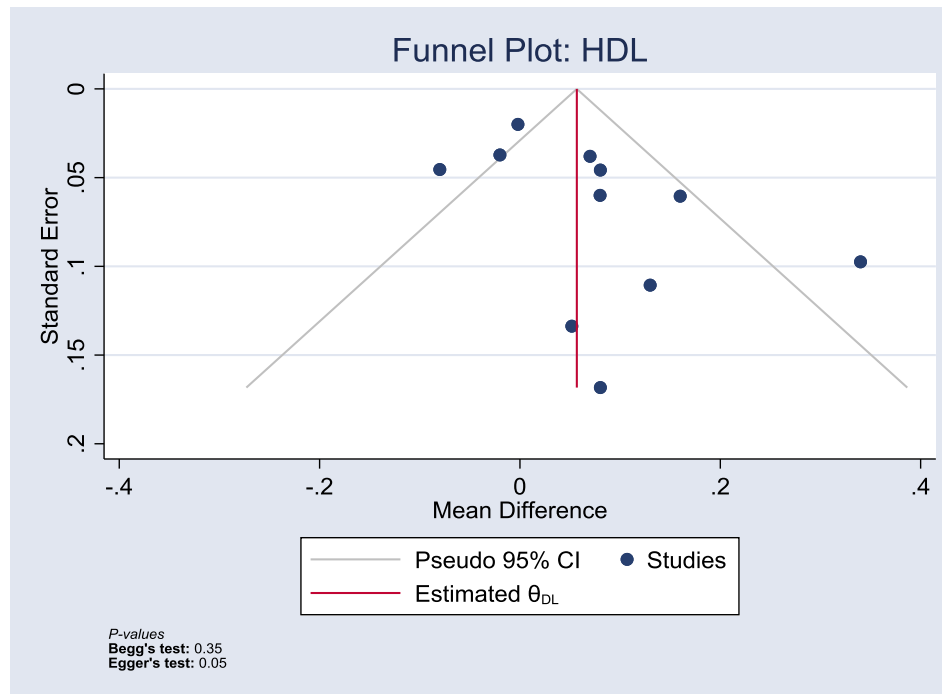

Funnel plot and corresponding Begg's and Egger's test for assessment of potential publication bias in meta-analysis of RCTs replacing white rice with brown rice for HDL cholesterol.

**Supplemental figure 27: Funnel plot for meta-analysis of RCTs replacing white rice with brown rice for LDL cholesterol**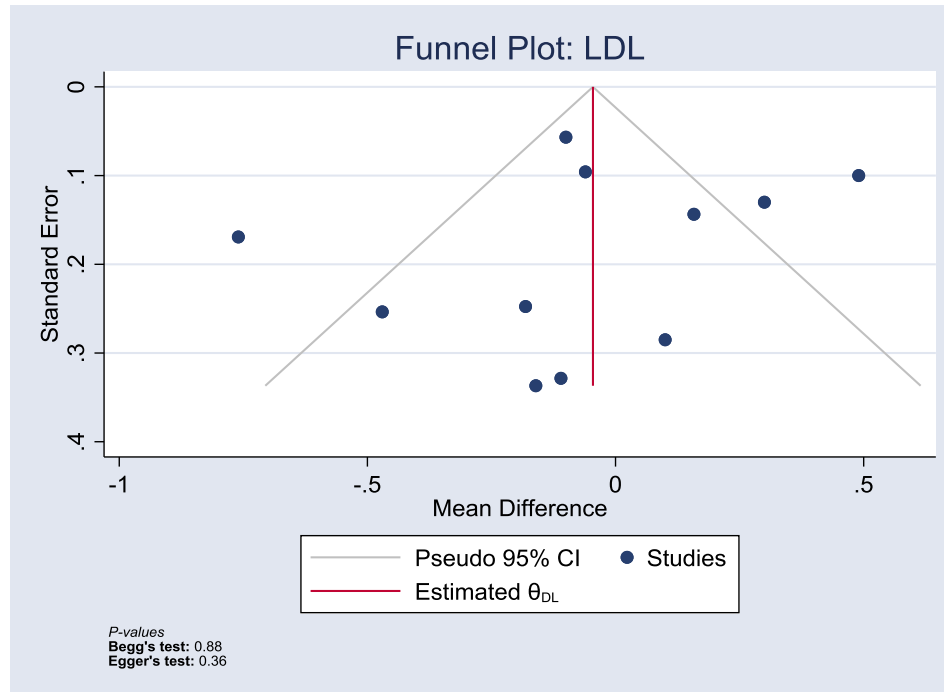

Funnel plot and corresponding Begg's and Egger's test for assessment of potential publication bias in meta-analysis of RCTs replacing white rice with brown rice for LDL cholesterol.

**Supplemental figure 28: Funnel plot for meta-analysis of RCTs replacing white rice with brown rice for triglycerides**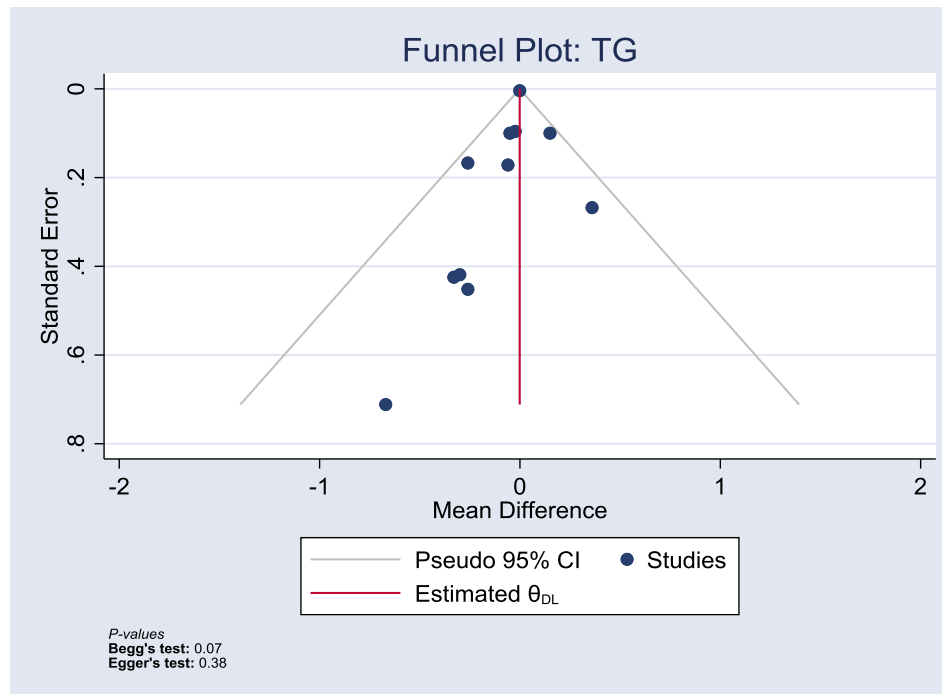

Funnel plot and corresponding Begg's and Egger's test for assessment of potential publication bias in meta-analysis of RCTs replacing white rice with brown rice for triglycerides (TG).
